# Supplementary material for: Reversible [4 + 2] cycloaddition reaction of 1,3,2,5-diazadiborinine with ethylene
Source: PubMed Central journal article supplement (PMC5952552; doi:10.1039/c5sc03174e), 2015-09-15

## SUPPORTING INFORMATION

### Reversible [4+2] Cycloaddition Reaction of 1,3,2,5-Diazadiborinine with Ethylene

Di Wu,<sup>†</sup> Rakesh Ganguly,<sup>‡</sup> Yongxin Li,<sup>‡</sup> Sin Ni Hoo,<sup>†</sup> Hajime Hirao<sup>\*,†</sup> and Rei Kinjo<sup>\*,†</sup>

<sup>†</sup> *Division of Chemistry and Biological Chemistry, School of Physical and  
Mathematical Sciences, and* <sup>‡</sup> *NTU-CBC Crystallography Facility,  
Nanyang Technological University, Singapore 637371, Singapore*

## CONTENTS

1. Synthesis, physical and spectroscopic data
2. Kinetic study
3. Crystal Structure Determination
4. DFT Calculation
5. References
6. NMR spectra

## 1. Synthesis, physical and spectroscopic data for all new compounds

**General considerations:** All reactions were performed under an atmosphere of dry argon using standard Schlenk or dry box techniques; solvents were dried over Na metal, K metal or CaH<sub>2</sub>, and distilled under nitrogen. Reagents were of analytical grade, obtained from commercial suppliers and used without further purification. <sup>1</sup>H, <sup>13</sup>C, <sup>11</sup>B and <sup>19</sup>F NMR spectra were recorded on a Bruker AVIII 400MHz or Bruker Avance 500MHz AV500, spectrometers at 298 K. NMR multiplicities are abbreviated as follows: s = singlet, d = doublet, m = multiplet. Coupling constants *J* are given in Hz. In the <sup>13</sup>C NMR spectra of compounds **2**, **4a-4e**, **6**, signals for the carbon atoms directly bonding to the boron atom could not be observed, presumable due to the coupling with the boron atom. Electrospray ionization (ESI) mass spectra were obtained at the Mass Spectrometry Laboratory at the Division of Chemistry and Biological Chemistry, Nanyang Technological University. Melting points were measured with OptiMelt (Stanford Research System).

**Compound 2:** A C<sub>6</sub>D<sub>6</sub> (0.35 mL) solution of 1,3,2,5-diazadiborinine **1** (0.010 g, 0.027 mmol) was added to a J-Young NMR tube. The sample was degassed using a freeze-pump-thaw method. Ethylene (1 bar) was introduced into the NMR tube at room temperature, and the reaction was monitored by NMR spectroscopy. After 3 hour, all volatiles were removed under vacuum, which afforded a white powder of **2** (97 % yield).

Mp: 156 °C. <sup>1</sup>H NMR (500 MHz, C<sub>6</sub>D<sub>6</sub>): δ = 0.51 (s, 6 H), 0.91 (s, 6 H), 1.05-1.08 (m, 2 H), 1.25-1.28 (m, 2 H), 3.35 (d, *J* = 8.5 Hz, 2 H), 3.41 (d, *J* = 9.0 Hz, 2 H), 7.25-8.14 (m, 10 H); <sup>13</sup>C NMR (125 MHz, C<sub>6</sub>D<sub>6</sub>): δ = 26.1, 28.0, 65.3, 83.3, 126.0, 127.5, 127.8, 134.8; <sup>13</sup>C NMR (DEPT-135, 125 MHz, C<sub>6</sub>D<sub>6</sub>): δ = 26.1, 28.0, 126.0, 127.5, 127.8, 128.0, 128.4, 134.8; <sup>11</sup>B NMR (76.8 MHz, C<sub>6</sub>D<sub>6</sub>): δ = -16.0 (s), 1.6 (s). HRMS (ESI): *m/z* calcd for C<sub>24</sub>H<sub>31</sub>B<sub>2</sub>N<sub>2</sub>O<sub>2</sub>: 401.2572 [(*M+H*)]<sup>+</sup>; found: 401.2581.

**Compound 4a:** Styrene **3a** (6.2 μL, 0.054 mmol) was added into a C<sub>6</sub>D<sub>6</sub> (0.6 mL) solution of **1** (0.010 g, 0.027 mmol) in a J-Young NMR tube at room temperature. The reaction was monitored by NMR spectroscopy. After 12 hours, all volatiles were removed under vacuum. The residue was washed with hexane and dried under vacuum to afford a colorless solid of **4a** (90 %).

Mp: 132 °C. <sup>1</sup>H NMR (400 MHz, C<sub>6</sub>D<sub>6</sub>) δ = 0.57 (s, 3 H), 0.59 (s, 3 H), 0.91 (s, 3 H), 1.1 (s, 3 H), 1.29 (dd, *J* = 5.0 Hz, *J* = 13.6 Hz, 1 H), 1.84 (dd, *J* = 10 Hz, *J* = 13.6 Hz, 1 H), 2.72 (dd, *J* = 5.0 Hz, *J* = 10 Hz, 1 H), 3.37 (d, *J* = 8.8 Hz, 1 H), 3.48 (d, *J* = 8.8 Hz, 1 H), 3.61 (d, *J* = 8.8 Hz, 1 H), 3.70 (d, *J* = 8.8 Hz, 1 H), 6.99-8.02 (m, 15 H); <sup>13</sup>C NMR (100 MHz, C<sub>6</sub>D<sub>6</sub>): δ = 25.4, 25.8, 27.8, 29.0, 65.0, 65.4, 83.4, 83.8, 123.9, 125.5, 127.1, 127.9, 128.2, 135.1, 151.9; <sup>13</sup>C NMR (DEPT-135, 100 MHz, C<sub>6</sub>D<sub>6</sub>): δ = 25.4, 25.8, 27.8, 29.0, 123.9, 125.5, 127.1 (CH x2), 127.9 (CH x5), 128.2 (CH x3), 135.1 (CH x3); <sup>11</sup>B NMR (76.8 MHz, C<sub>6</sub>D<sub>6</sub>): δ = -14.3 (s), 0.8 (s); HRMS (ESI): *m/z*

calcd for C<sub>30</sub>H<sub>35</sub>B<sub>2</sub>N<sub>2</sub>O<sub>2</sub>: 477.2885 [(M+H)]<sup>+</sup>; found: 477.2899.

**Compound 4b:** By following the procedure for the synthesis of **4a**, the reaction of **1** and **3b** afforded **4b** as a colorless solid (83 %).

Mp: 116 °C. <sup>1</sup>H NMR (400 MHz, C<sub>6</sub>D<sub>6</sub>): δ = 0.56 (s, 3 H), 0.60 (s, 3 H), 0.89 (s, 3 H), 1.07 (s, 3H), 1.28 (dd, *J* = 5.0 Hz, *J* = 13.5 Hz, 1 H), 1.84 (dd, *J* = 9.9 Hz, *J* = 13.5 Hz, 1 H), 2.13 (s, 3 H), 2.73 (dd, *J* = 5.0 Hz, *J* = 9.9 Hz, 1 H), 3.34 (d, *J* = 8.8 Hz, 1 H), 3.45 (d, *J* = 8.8 Hz, 1 H), 3.61 (d, *J* = 8.8 Hz, 1 H), 3.72 (d, *J* = 8.8 Hz, 1 H), 6.95-8.04 (m, 14 H); <sup>13</sup>C NMR (100 MHz, C<sub>6</sub>D<sub>6</sub>): δ = 21.1, 25.5, 25.8, 27.8, 29.0, 65.0, 65.4, 83.4, 83.8, 125.5, 127.1, 128.7, 132.6, 135.2, 148.7; <sup>13</sup>C NMR (DEPT-135, 100 MHz, C<sub>6</sub>D<sub>6</sub>): δ = 21.1, 25.5, 25.8, 27.8, 29.0, 125.5, 127.1 (CH x2), 127.9, 128.1 (CH x3), 128.4, 128.7 (CH x3), 135.2 (CH x3); <sup>11</sup>B NMR (76.8 MHz, C<sub>6</sub>D<sub>6</sub>): δ = -14.3 (s), 0.9 (s); HRMS (ESI): *m/z* calcd for C<sub>31</sub>H<sub>37</sub>B<sub>2</sub>N<sub>2</sub>O<sub>2</sub>: 491.3041 [(M+H)]<sup>+</sup>; found: 491.3050.

**Compound 4c:** By following the procedure for the synthesis of **4a**, the reaction of **1** and **3c** afforded **4c** as a colorless solid (85 %).

Mp: 117 °C. <sup>1</sup>H NMR (400 MHz, C<sub>6</sub>D<sub>6</sub>): δ = 0.57 (s, 3 H), 0.58 (s, 3 H), 0.89 (s, 3 H), 1.06 (s, 3 H), 1.25 (dd, *J* = 5.0 Hz, *J* = 13.6 Hz, 1 H), 1.85 (dd, *J* = 10 Hz, *J* = 13.6 Hz, 1 H), 2.73 (dd, *J* = 5.0 Hz, *J* = 10 Hz, 1 H), 3.32 (s, 3 H), 3.34 (d, *J* = 8.8 Hz, 1 H), 3.46 (d, *J* = 8.8 Hz, 1 H), 3.60 (d, *J* = 8.8 Hz, 1 H), 3.68 (d, *J* = 8.8 Hz, 1 H), 6.76-8.05 (m, 14 H); <sup>13</sup>C NMR (100 MHz, C<sub>6</sub>D<sub>6</sub>): δ = 25.5, 25.8, 27.8, 28.9, 54.7, 65.0, 65.4, 83.4, 83.8, 113.6, 125.6, 127.1, 127.9, 128.9, 135.2, 143.6, 157.0; <sup>13</sup>C NMR (DEPT-135, 100 MHz, C<sub>6</sub>D<sub>6</sub>): δ = 25.5, 25.8, 27.8, 28.9, 54.7, 113.6 (CH x3), 125.6, 127.1 (CH x2), 127.9, 128.4, 128.9 (CH x3), 135.2 (CH x3); <sup>11</sup>B NMR (76.8 MHz, C<sub>6</sub>D<sub>6</sub>): δ = -14.3 (s), 1.1 (s); HRMS (ESI): *m/z* calcd for C<sub>31</sub>H<sub>37</sub>B<sub>2</sub>N<sub>2</sub>O<sub>3</sub>: 507.2990 [(M+H)]<sup>+</sup>; found: 507.3000.

**Compound 4d:** By following the procedure for the synthesis of **4a**, the reaction of **1** and **3d** afforded **4d** as a colorless solid (89 %).

Mp: 273 °C. <sup>1</sup>H NMR (400 MHz, C<sub>6</sub>D<sub>6</sub>): δ = 0.51 (s, 3 H), 0.53 (s, 3 H), 0.87 (s, 3 H), 1.04 (s, 3 H), 1.13 (dd, *J* = 5.0 Hz, *J* = 13.6 Hz, 1 H), 1.73 (dd, *J* = 9.8 Hz, *J* = 13.6 Hz, 1 H), 2.56 (dd, *J* = 5.0 Hz, *J* = 9.8 Hz, 1 H), 3.32 (d, *J* = 8.8 Hz, 1 H), 3.44 (d, *J* = 8.8 Hz, 1 H), 3.56 (s, 2 H), 6.82-7.95 (m, 14 H); <sup>13</sup>C NMR (100 MHz, C<sub>6</sub>D<sub>6</sub>): δ = 25.4, 25.8, 27.8, 28.9, 65.0, 65.5, 83.4, 83.8, 117.4, 125.8, 127.2, 128.0, 129.8, 130.8, 135.0, 151.0; <sup>13</sup>C NMR (DEPT-135, 100 MHz, C<sub>6</sub>D<sub>6</sub>): δ = 25.4, 25.8, 27.8, 28.9, 125.8, 127.2 (CH x2), 128.0, 128.4, 129.8 (CH x3), 130.8 (CH x3), 135.0 (CH x3); <sup>11</sup>B NMR (76.8 MHz, C<sub>6</sub>D<sub>6</sub>): δ = -14.4 (s), 1.0 (s); HRMS (ESI): *m/z* calcd for C<sub>30</sub>H<sub>34</sub>B<sub>2</sub>N<sub>2</sub>O<sub>2</sub>Br: 555.1990 [(M+H)]<sup>+</sup>; found: 555.2003.

**Compound 4e:** By following the procedure for the synthesis of **4a**, the reaction of **1** and **3e** afforded **4e** as a colorless solid (86 %).

Mp: 150 °C. <sup>1</sup>H NMR (400 MHz, C<sub>6</sub>D<sub>6</sub>): δ = 0.53 (s, 3 H), 0.54 (s, 3 H), 0.88 (s, 3 H), 1.04 (s, 3 H), 1.16 (dd, *J* = 4.9 Hz, *J* = 13.7 Hz, 1 H), 1.73 (dd, *J* = 9.8 Hz, *J* = 13.7 Hz, 1 H), 2.60 (dd, *J* = 4.9 Hz, *J* = 9.8 Hz, 1 H), 3.34 (d, *J* = 8.8 Hz, 1 H), 3.46 (d, *J* = 8.8 Hz, 1 H), 3.56 (d, *J* = 9.0 Hz, 1 H), 3.59 (d, *J* = 9.0 Hz, 1 H), 6.97-7.90 (m, 14 H); <sup>13</sup>C NMR (100 MHz, C<sub>6</sub>D<sub>6</sub>): δ = 25.4, 25.8, 27.8, 29.0, 65.1, 65.5, 83.5, 83.9, 124.67, 124.70, 124.74, 125.9, 127.2, 134.9, 156.7; <sup>13</sup>C NMR (DEPT-135, 100 MHz, C<sub>6</sub>D<sub>6</sub>): δ = 25.4, 25.8, 27.8, 29.0, 124.67, 124.70, 124.74, 125.9, 127.2, 128.1, 128.4, 134.9; <sup>11</sup>B NMR (76.8 MHz, C<sub>6</sub>D<sub>6</sub>): δ = -14.4 (s), 1.0 (s); <sup>19</sup>F NMR (225.6 MHz, C<sub>6</sub>D<sub>6</sub>): δ = -61.4; HRMS (ESI): *m/z* calcd for C<sub>31</sub>H<sub>34</sub>B<sub>2</sub>N<sub>2</sub>O<sub>2</sub>F<sub>3</sub>: 545.2758 [(*M+H*)<sup>+</sup>]; found: 545.2769.

**Compound 6:** Norbornene **5** (0.006 g, 0.065 mmol) was added into a C<sub>6</sub>D<sub>6</sub> (0.5 mL) solution of **1** (0.020 g, 0.054 mmol) in a J-Young NMR tube. The reaction was monitored by NMR spectroscopy. After heating at 90 °C for 12 hours, the solvent was removed under vacuum. The resulting residue was recrystallized from benzene/hexane to afford colorless crystals of **6** (83 %).

Mp: 250 °C. <sup>1</sup>H NMR (400 MHz, C<sub>6</sub>D<sub>6</sub>): δ = 0.49 (s, 3 H), 0.55 (s, 3 H), 0.75 (d, *J* = 9.6 Hz, 1 H), 0.82 (s, 3 H), 0.90 (d, *J* = 9.6 Hz, 1 H), 1.19 (s, 3 H), 1.30-2.65 (m, 8 H), 3.32 (d, *J* = 8.8 Hz, 1 H), 3.37 (d, *J* = 8.8 Hz, 1 H), 3.52 (d, *J* = 8.8 Hz, 1 H), 3.64 (d, *J* = 8.8 Hz, 1 H), 7.24-8.27 (m, 10 H); <sup>13</sup>C NMR (100 MHz, C<sub>6</sub>D<sub>6</sub>): δ = 23.9, 25.8, 28.2, 30.4, 34.3, 34.5, 35.3, 40.3, 41.2, 64.3, 64.9, 83.8, 84.7, 125.7, 127.5, 127.7, 135.2; <sup>13</sup>C NMR (DEPT-135, 100 MHz, C<sub>6</sub>D<sub>6</sub>): δ = 23.9, 25.8, 28.2, 30.4, 40.3, 41.2, 125.7, 127.5 (CH x3), 127.7 (CH x2), 128.4 (CH x2), 135.2 (CH x3); <sup>11</sup>B NMR (76.8 MHz, C<sub>6</sub>D<sub>6</sub>): δ = -15.8 (s), 1.3 (s); HRMS (ESI): *m/z* calcd for C<sub>29</sub>H<sub>37</sub>B<sub>2</sub>N<sub>2</sub>O<sub>2</sub>: 467.3041 [(*M+H*)<sup>+</sup>]; found: 467.3051.

## 2. Kinetic study

**General procedure for the reaction of 1 and 3a at various temperatures:** **1** (0.014 mmol), **3a** (0.067 mmol), the internal standard 1,4-di-tert-butylbenzene (0.013 mmol), and THF- $d_8$  (0.5 mL) were loaded into a dried J-Young-Tube under argon atmosphere. The tube was sealed and heated over a temperature range from 27 °C to 65 °C. The reaction was monitored by  $^1\text{H}$  NMR spectroscopy. Based on the integration of **1**, the concentration of **1** was plotted against time which follows first-order kinetics (Figure S2-1). The Eyring plot (Figure S2-2) was obtained based on the rate at each temperature and plotted against inverse of temperature.

| 27 °C    |             |           |
|----------|-------------|-----------|
| Time / s | [1] / M     | Ln [1]    |
| 0        | 0.018072232 | -4.013379 |
| 840      | 0.017598936 | -4.039917 |
| 1260     | 0.016425156 | -4.108941 |
| 1560     | 0.015763341 | -4.150068 |
| 1800     | 0.015206609 | -4.186025 |
| 2160     | 0.014499609 | -4.233634 |
| 2460     | 0.013962633 | -4.271371 |
| 2760     | 0.013336756 | -4.317231 |
| 3060     | 0.012834038 | -4.355654 |
| 3360     | 0.012201016 | -4.406236 |
| 3660     | 0.011724778 | -4.446051 |
| 3960     | 0.011298560 | -4.48308  |
| 4260     | 0.010826526 | -4.525756 |
| 4560     | 0.010396735 | -4.566263 |
| 4860     | 0.009998049 | -4.605365 |
| 5160     | 0.009540936 | -4.652164 |
| 5460     | 0.009249855 | -4.683147 |
| 5760     | 0.008851800 | -4.727134 |

| 40 °C    |             |              |
|----------|-------------|--------------|
| Time / s | [1] / M     | Ln [1]       |
| 0        | 0.018023893 | -4.016056994 |
| 360      | 0.016039079 | -4.132727076 |

|      |             |              |
|------|-------------|--------------|
| 480  | 0.015125905 | -4.191346431 |
| 600  | 0.014486158 | -4.234561718 |
| 720  | 0.013978395 | -4.270242344 |
| 840  | 0.013191531 | -4.328180234 |
| 960  | 0.012627024 | -4.371916039 |
| 1080 | 0.012101817 | -4.414399672 |
| 1200 | 0.011506625 | -4.464832323 |
| 1320 | 0.011011683 | -4.508798524 |
| 1440 | 0.010504550 | -4.555946751 |
| 1560 | 0.010070346 | -4.598160213 |
| 1680 | 0.009620800 | -4.643827910 |
| 1800 | 0.009386254 | -4.668509054 |
| 1920 | 0.009034435 | -4.706711947 |
| 2040 | 0.008518055 | -4.765567251 |
| 2160 | 0.008284980 | -4.793311022 |
| 2280 | 0.007989276 | -4.829655178 |
| 2400 | 0.007527329 | -4.889214970 |
| 2520 | 0.007282906 | -4.922225389 |
| 2640 | 0.006979215 | -4.964818880 |

| 55 °C    |             |              |
|----------|-------------|--------------|
| Time / s | [I] / M     | Ln [I]       |
| 0        | 0.018023893 | -4.016056994 |
| 540      | 0.013171565 | -4.329694914 |
| 660      | 0.011502422 | -4.465197686 |
| 780      | 0.010372356 | -4.568611137 |
| 900      | 0.009239347 | -4.684284067 |
| 1020     | 0.008317136 | -4.789437354 |
| 1140     | 0.007692731 | -4.867479487 |
| 1260     | 0.006948741 | -4.969194859 |
| 1380     | 0.006398524 | -5.051687914 |
| 1500     | 0.005916612 | -5.129991291 |
| 1620     | 0.005534529 | -5.196748811 |
| 1740     | 0.005232520 | -5.252862377 |
| 1860     | 0.004831101 | -5.332680852 |
| 1980     | 0.004493363 | -5.405153786 |
| 2100     | 0.004323549 | -5.443678763 |
| 2220     | 0.004202072 | -5.472177463 |

| 65 °C    |             |              |
|----------|-------------|--------------|
| Time / s | [1] / M     | Ln [1]       |
| 0        | 0.018023893 | -4.016056994 |
| 180      | 0.011479303 | -4.467209575 |
| 260      | 0.009933948 | -4.611797314 |
| 340      | 0.008859786 | -4.726232668 |
| 420      | 0.007720893 | -4.863825270 |
| 500      | 0.007096488 | -4.948155312 |
| 580      | 0.006403148 | -5.050965561 |
| 660      | 0.005948137 | -5.124677218 |
| 740      | 0.005393928 | -5.222481495 |
| 820      | 0.005083722 | -5.281711707 |

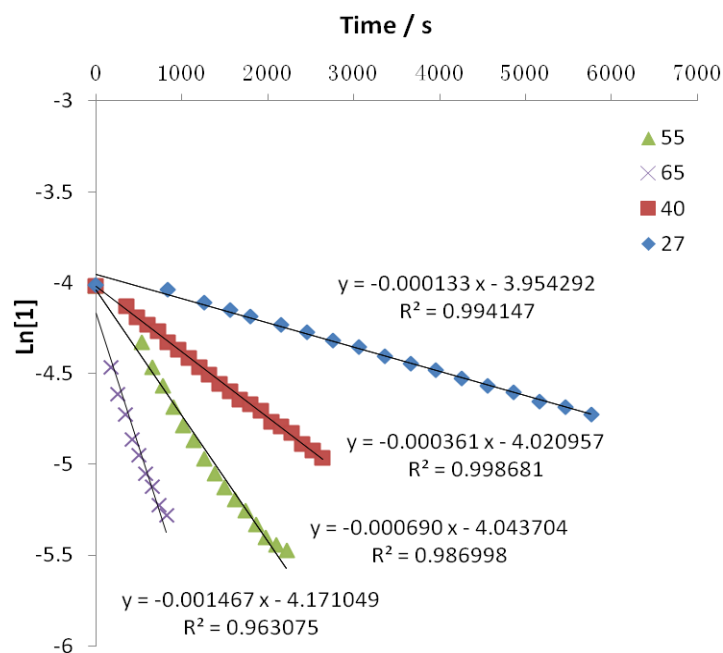

**Figure S2-1.** Plots of  $\ln [1]$  against time to determine rate constant ( $k$ ) at various temperatures.

| T/K    | 1/(T/K <sup>-1</sup> ) | k/s <sup>-1</sup> | (k/s <sup>-1</sup> )/(T/K) | Ln(k/T)      |
|--------|------------------------|-------------------|----------------------------|--------------|
| 300.15 | 0.003331667            | 0.000133          | 4.43112E-07                | -14.62944378 |
| 313.15 | 0.003193358            | 0.000361          | 1.1528E-06                 | -13.67331491 |
| 328.15 | 0.003047387            | 0.000690          | 2.1027E-06                 | -13.07228978 |
| 338.15 | 0.002957267            | 0.001467          | 4.33831E-06                | -12.34802536 |

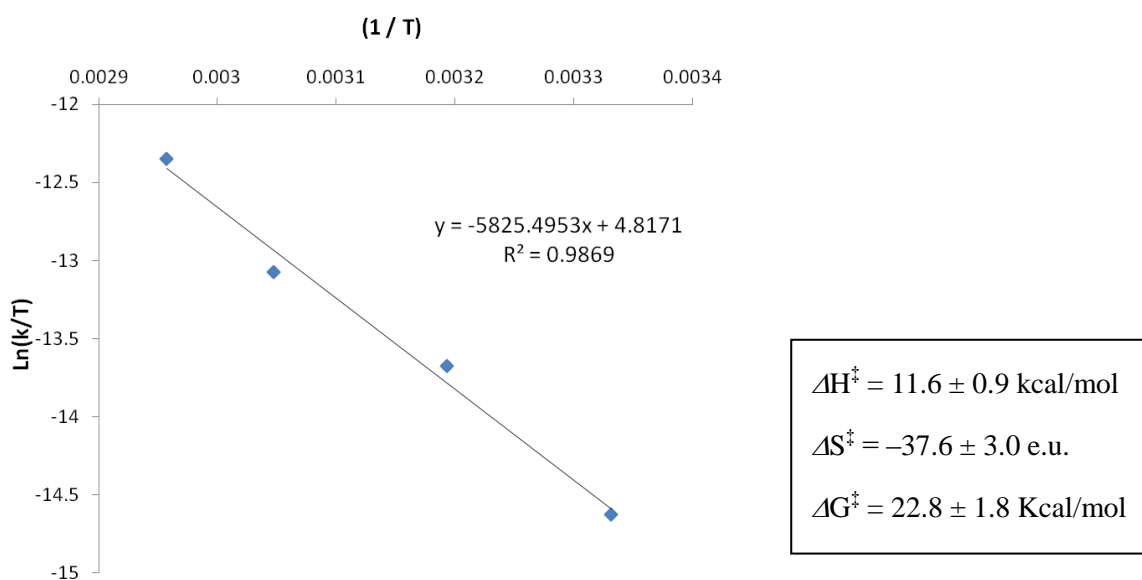

**Figure S2-2.** Eyring plot for the cycloaddition reaction between **1** and **3a**



**General procedure for the Hammett Plot:** Compound **1** (0.014 mmol), styrene (0.067 mmol), internal standard 1,4-di-*tert*-butylbenzene (0.013 mmol), and THF- $d_8$  (0.5 mL) were loaded in a dried J-Young-Tube under argon atmosphere. The tube was sealed and the reaction was monitored by NMR spectroscopy at room temperature. The rate constant ( $k$ ) for each substrate **3a-e** was obtained from the plot of substrate concentration against time. The Hammett plot is obtained by plotting  $k$  against substituent coefficient  $\sigma$  (Figure S2-3).<sup>[1]</sup>

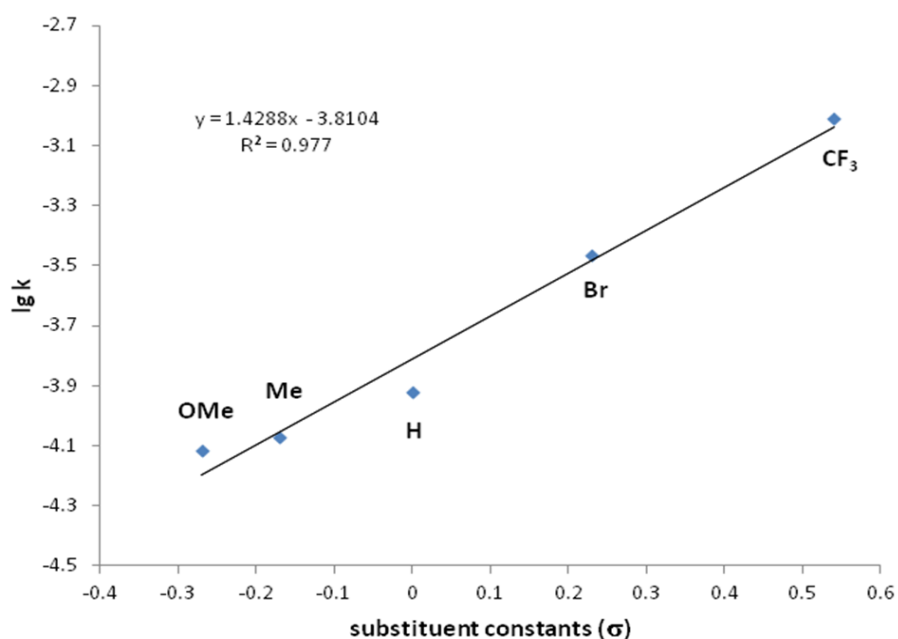

| <i>para</i> -substituents     | Substituent constant | lg k         |
|-------------------------------|----------------------|--------------|
| OMe ( <b>3c</b> )             | -0.27                | -4.113509275 |
| Me ( <b>3b</b> )              | -0.17                | -4.070581074 |
| H ( <b>3a</b> )               | 0.00                 | -3.920818754 |
| Br ( <b>3d</b> )              | 0.23                 | -3.465973894 |
| CF <sub>3</sub> ( <b>3e</b> ) | 0.54                 | -3.009661145 |

**Figure S2-3.** Hammett plots with  $\rho = +1.43$ : substitution at the *para*-position on phenyl group.

**General procedure to estimate equilibrium constants ( $K_{4-1}$ ) at room temperature:** Compound **4** (0.015 mmol), internal standard 1,4-di-tert-butylbenzene (0.015 mmol) and  $C_6D_6$  (0.6 mL) were loaded in a dried J-Young-Tube under argon atmosphere. The tube was sealed and the reaction was monitored by NMR spectroscopy at room temperature.

**Table S2-1.** Summary of reaction time (h) vs the conversion (%) of **4** to **1** and **3** under the reaction condition.

|           | 12h    | 36h    | 60h    | 84h    | 108h   |
|-----------|--------|--------|--------|--------|--------|
| <b>4a</b> | 7.60%  | 14.60% | 16.90% | 18.00% | 18.00% |
| <b>4b</b> | 12.00% | 18.40% | 21.00% | 21.60% | 21.60% |
| <b>4c</b> | 14.70% | 21.60% | 24.20% | 25.10% | 25.10% |
| <b>4d</b> | 5.30%  | 6.70%  | 7.10%  | 7.10%  | 7.10%  |
| <b>4e</b> | 4.00%  | 4.30%  | 4.60%  | 4.60%  | 4.60%  |

**Table S2-2.** Summary of the concentration (M) of [**4**] and [**1**] (= [**3**]) in the equilibrium states.

| Concentrations of <b>4</b> and <b>1</b> in equilibrium |              |              |                                             |
|--------------------------------------------------------|--------------|--------------|---------------------------------------------|
| <i>para</i> -substituents                              | [ <b>4</b> ] | [ <b>1</b> ] | equilibrium constants ( $K_{4-1}$ ) at r.t. |
| <b>H</b>                                               | 0.01764      | 0.00392      | $1.148 \times 10^3$                         |
| <b>Me</b>                                              | 0.02050      | 0.00584      | $0.601 \times 10^3$                         |
| <b>OMe</b>                                             | 0.01890      | 0.00643      | $0.457 \times 10^3$                         |
| <b>Br</b>                                              | 0.01993      | 0.00151      | $8.741 \times 10^3$                         |
| <b>CF<sub>3</sub></b>                                  | 0.01931      | 0.00098      | $2.011 \times 10^4$                         |

**General procedure for retro Diels-alder reaction of 4a-e at high temperature:** Compound **4** (0.006 mmol) and  $C_6D_6$  (0.4 mL) were loaded in a dried J-Young-Tube under argon atmosphere. The tube was sealed and heated over a temperature range from 110 °C to 150 °C. The reaction was monitored by NMR spectroscopy.

**Table S2-3.** Summary of the reaction time vs the conversion (%) of **4** to **1** and **3** under the reaction temperature (110 ~ 150 °C).

| T      | <b>4a</b>     | <b>4b</b>     | <b>4c</b>     | <b>4d</b>     | <b>4e</b>     |
|--------|---------------|---------------|---------------|---------------|---------------|
| 110 °C | 25 min (100%) | 15 min (100%) | 13 min (100%) | 30 min (73%)  | 30 min (60%)  |
| 130 °C |               |               |               | 60 min (85%)  | 60 min (79%)  |
| 150 °C |               |               |               | 120 min (87%) | 120 min (80%) |
| 150 °C |               |               |               | 12 h (87%)    | 12 h (80%)    |

### 3. Crystal Structure Determination of Compounds 2, 4a, 4b, 4d, and 6

X-ray data collection and structural refinement. Intensity data for compounds **2**, **4a**, **4b**, **4d** and **6** were collected using a Bruker APEX II diffractometer. The crystals of **2**, **4a**, **4d** and **6** were measured at 153(2) K and the crystal of **4b** was measured at 103(2). The structure was solved by direct phase determination (SHELXS-97)<sup>[2]</sup> and refined for all data by full-matrix least squares methods on  $F^2$ .<sup>[3]</sup> All non-hydrogen atoms were subjected to anisotropic refinement. The hydrogen atoms were generated geometrically and allowed to ride in their respective parent atoms; they were assigned appropriate isotropic thermal parameters and included in the structure-factor calculations. CCDC:1418724-1418728 contains the supplementary crystallographic data for this paper. The data can be obtained free of charge from the Cambridge Crystallography Data Center via [www.ccdc.cam.ac.uk/data\\_request/cif](http://www.ccdc.cam.ac.uk/data_request/cif).

**Table S3-1.** Summary of Data Collection and Structure Refinement.

|                                            | <b>2·(C<sub>6</sub>D<sub>6</sub>)<sub>1/2</sub></b>                                         | <b>4a</b>                                                                    | <b>4b</b>                                                                    |
|--------------------------------------------|---------------------------------------------------------------------------------------------|------------------------------------------------------------------------------|------------------------------------------------------------------------------|
| Formula                                    | C <sub>27</sub> H <sub>30</sub> B <sub>2</sub> D <sub>3</sub> N <sub>2</sub> O <sub>2</sub> | C <sub>30</sub> H <sub>34</sub> B <sub>2</sub> N <sub>2</sub> O <sub>2</sub> | C <sub>31</sub> H <sub>36</sub> B <sub>2</sub> N <sub>2</sub> O <sub>2</sub> |
| Fw                                         | 422.19                                                                                      | 476.21                                                                       | 490.24                                                                       |
| cryst syst                                 | triclinic                                                                                   | triclinic                                                                    | monoclinic                                                                   |
| space group                                | <i>P</i> -1                                                                                 | <i>P</i> -1                                                                  | <i>P</i> 1 21/ <i>n</i> 1                                                    |
| Size (mm <sup>3</sup> )                    | 0.200 x 0.180 x 0.020                                                                       | 0.040 x 0.100 x 0.180                                                        | 0.360 x 0.400 x 0.420                                                        |
| T, K                                       | 153(2)                                                                                      | 153(2)                                                                       | 103(2)                                                                       |
| <i>a</i> , Å                               | 6.2435(5)                                                                                   | 12.0335(18)                                                                  | 9.498(2)                                                                     |
| <i>b</i> , Å                               | 13.8921(9)                                                                                  | 13.357(2)                                                                    | 9.090(2)                                                                     |
| <i>c</i> , Å                               | 14.2338(10)                                                                                 | 17.045(3)                                                                    | 30.647(7)                                                                    |
| $\alpha$ , deg                             | 100.533(4)°                                                                                 | 73.663(4)°                                                                   | 90°                                                                          |
| $\beta$ , deg                              | 92.139(5)°                                                                                  | 81.968(4)°                                                                   | 94.119(3)°                                                                   |
| $\gamma$ , deg                             | 100.164(5)°                                                                                 | 79.686(4)°                                                                   | 90°                                                                          |
| V, Å <sup>3</sup>                          | 1191.63(15)                                                                                 | 2575.0(7)                                                                    | 2639.1(11)                                                                   |
| Z                                          | 2                                                                                           | 4                                                                            | 4                                                                            |
| $d_{\text{calcd}}$ g·cm <sup>-3</sup>      | 1.232                                                                                       | 1.228                                                                        | 1.234                                                                        |
| $\mu$ , mm <sup>-1</sup>                   | 0.075                                                                                       | 0.075                                                                        | 0.075                                                                        |
| Refl collected                             | 4727                                                                                        | 9199                                                                         | 4811                                                                         |
| $T_{\text{min}}/T_{\text{max}}$            | 0.79/1.00                                                                                   | 0.9870/0.9970                                                                | 0.9690/0.9730                                                                |
| N <sub>measd</sub>                         | 4727                                                                                        | 9199                                                                         | 4811                                                                         |
| [R <sub>int</sub> ]                        | 0.1367                                                                                      | 0.0814                                                                       | 0.0862                                                                       |
| <i>R</i> [I>2 $\sigma$ (I)]                | 0.0771                                                                                      | 0.0858                                                                       | 0.0595                                                                       |
| <i>R</i> <sub>w</sub> [I>2 $\sigma$ (I)]   | 0.1726                                                                                      | 0.2381                                                                       | 0.1579                                                                       |
| GOF                                        | 0.928                                                                                       | 1.046                                                                        | 1.013                                                                        |
| Largest diff peak/hole[e·Å <sup>-3</sup> ] | 0.377/-0.238                                                                                | 0.555/-0.376                                                                 | 0.280/-0.365                                                                 |

|                                            | <b>4d</b>                                                                      | <b>6·(C<sub>6</sub>H<sub>6</sub>)<sub>1/2</sub></b>                          |
|--------------------------------------------|--------------------------------------------------------------------------------|------------------------------------------------------------------------------|
| Formula                                    | C <sub>30</sub> H <sub>33</sub> B <sub>2</sub> BrN <sub>2</sub> O <sub>2</sub> | C <sub>32</sub> H <sub>39</sub> B <sub>2</sub> N <sub>2</sub> O <sub>2</sub> |
| Fw                                         | 555.11                                                                         | 505.27                                                                       |
| cryst syst                                 | monoclinic                                                                     | monoclinic                                                                   |
| space group                                | <i>P 1 21/n 1</i>                                                              | <i>P 1 21/n 1</i>                                                            |
| Size (mm <sup>3</sup> )                    | 0.110 x 0.120 x 0.420                                                          | 0.180 x 0.220 x 0.300                                                        |
| T, K                                       | 153(2)                                                                         | 153(2)                                                                       |
| <i>a</i> , Å                               | 9.5066(6)                                                                      | 8.8862(4)                                                                    |
| <i>b</i> , Å                               | 9.2480(5)                                                                      | 21.9850(11)                                                                  |
| <i>c</i> , Å                               | 30.632(2)                                                                      | 14.0495(7)                                                                   |
| $\alpha$ , deg                             | 90°                                                                            | 90°                                                                          |
| $\beta$ , deg                              | 94.399(3)°                                                                     | 96.2349(19)°                                                                 |
| $\gamma$ , deg                             | 90°                                                                            | 90°                                                                          |
| V, Å <sup>3</sup>                          | 2685.1(3)                                                                      | 2728.5(2)                                                                    |
| Z                                          | 4                                                                              | 4                                                                            |
| $d_{\text{calcd}}$ g·cm <sup>-3</sup>      | 1.373                                                                          | 1.230                                                                        |
| $\mu$ , mm <sup>-1</sup>                   | 1.562                                                                          | 0.075                                                                        |
| Refl collected                             | 17487                                                                          | 44526                                                                        |
| $T_{\text{min}}/T_{\text{max}}$            | 0.5600/0.8470                                                                  | 0.9780/0.9870                                                                |
| N <sub>measd</sub>                         | 7720                                                                           | 6540                                                                         |
| [R <sub>int</sub> ]                        | 0.0636                                                                         | 0.0827                                                                       |
| <i>R</i> [I>2sigma(I)]                     | 0.0583                                                                         | 0.0502                                                                       |
| <i>R<sub>w</sub></i> [I>2sigma(I)]         | 0.1268                                                                         | 0.1777                                                                       |
| GOF                                        | 0.986                                                                          | 1.093                                                                        |
| Largest diff peak/hole[e·Å <sup>-3</sup> ] | 0.442 /-0.702                                                                  | 0.456/-0.504                                                                 |

#### 4. DFT Calculation

##### Method

All density functional theory (DFT) calculations were performed using Gaussian 09.<sup>[4]</sup> The M06-2X functional was used in conjunction with the 6-31G(d) basis set (B1) for geometry optimization and frequency calculations.<sup>[5,6]</sup> The M06-2X/B1 calculations, which yielded free energy correction values ( $G_{\text{corr}}$ ), were followed by single-point energy calculations at the M06-2X(SCRF)/B2//M06-2X/B1 level, where SCRF stands for a self-consistent reaction field model called IEFPCM to describe the solvent effect of benzene implicitly,<sup>[7]</sup> and B2 is the def2-TZVP basis set.<sup>[8]</sup> The energy obtained from the B2 calculation is referred to as E(B2). The following quantity G was used to evaluate the relative stability of different species.

$$G = E(\text{B2}) + G_{\text{corr}}$$

|               | E(B1)<br>[au] | ZPE<br>[au] | $G_{\text{corr}}$<br>[au] | E(B2)<br>[kcal/mol] | $\Delta G$<br>[kcal/mol] |
|---------------|---------------|-------------|---------------------------|---------------------|--------------------------|
| <b>1</b>      | -1163.275382  | 0.456768    | 0.402862                  | -1163.710364        |                          |
| <b>3a</b>     | -309.499518   | 0.134589    | 0.104686                  | -309.618074         |                          |
| <b>1 + 3a</b> | -1472.774900  | 0.591357    | 0.507548                  | -1473.328438        | 0.0                      |
| <b>RCA</b>    | -1472.797741  | 0.594082    | 0.529794                  | -1473.344901        | 3.6                      |
| <b>RCB</b>    | -1472.797505  | 0.593558    | 0.530796                  | -1473.344503        | 4.5                      |
| <b>TSA</b>    | -1472.774610  | 0.593314    | 0.532590                  | -1473.319729        | 21.2                     |
| <b>TSB</b>    | -1472.772560  | 0.594128    | 0.534396                  | -1473.317565        | 23.7                     |
| <b>4a(A)</b>  | -1472.819330  | 0.596051    | 0.535589                  | -1473.361109        | -2.9                     |
| <b>4a(B)</b>  | -1472.815660  | 0.596568    | 0.537085                  | -1473.357273        | 0.4                      |

**Figure S4-1.** Key frontier orbitals of **1** (a) and **3a** (b) (M06/6-31G\*). Orbital energies (in hartrees) are shown in parentheses. Hydrogen atoms are omitted for clarity.

(a) **1**

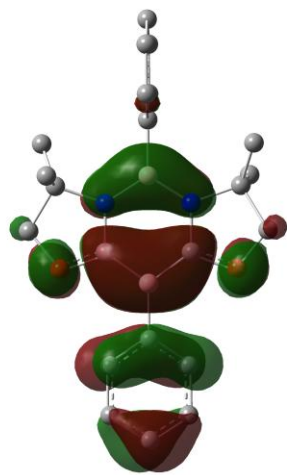

HOMO  
(-0.198)

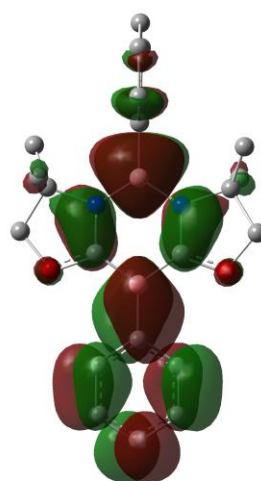

LUMO+3  
(0.044)

(b) **3a**

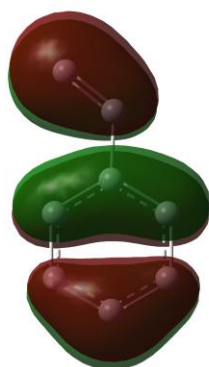

HOMO  
(-0.272)

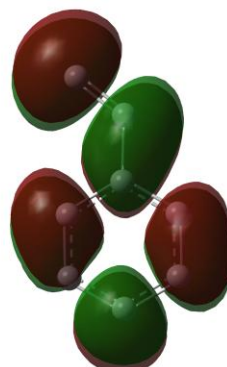

LUMO  
(0.004)

**Figure S4-2.** Key Mulliken charges of **1** (a) and **3a** (b) (M06/6-31G\*). Hydrogen atoms are omitted for clarity.

(a) **1**

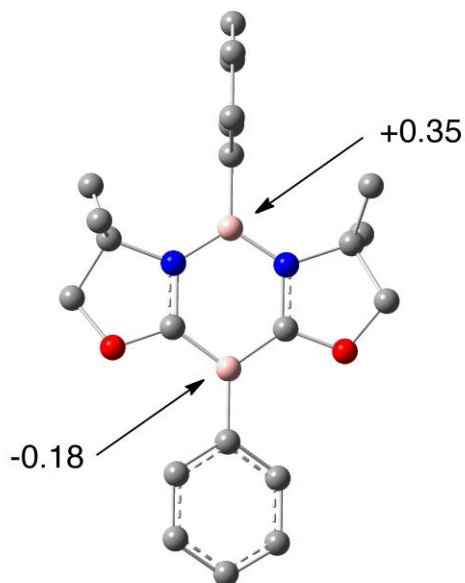

(b) **3a**

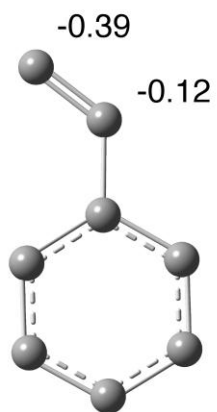

## XYZ Coordinates of Optimized Geometries

==== 1 ====

|   |           |           |           |
|---|-----------|-----------|-----------|
| B | 1.877167  | -0.000073 | 0.000185  |
| C | 3.449107  | -0.000109 | 0.000095  |
| C | 1.004437  | -1.208402 | -0.092896 |
| C | 1.004514  | 1.208298  | 0.093307  |
| C | 4.186191  | 1.140717  | -0.362674 |
| C | 4.186196  | -1.140966 | 0.362761  |
| N | -0.374188 | -1.205567 | -0.101229 |
| O | 1.462053  | -2.484426 | -0.173649 |
| N | -0.374104 | 1.205529  | 0.101674  |
| O | 1.462188  | 2.484301  | 0.174019  |
| H | 3.656339  | 2.043933  | -0.650615 |
| C | 5.577979  | 1.144464  | -0.364141 |
| H | 3.656348  | -2.044161 | 0.650781  |
| C | 5.577986  | -1.144773 | 0.364021  |
| B | -1.144652 | 0.000016  | 0.000232  |
| C | -0.866196 | -2.611911 | -0.065929 |
| C | 0.389221  | -3.321376 | -0.579880 |
| C | -0.866061 | 2.611876  | 0.066386  |
| C | 0.389404  | 3.321308  | 0.580268  |
| H | 6.115752  | 2.044268  | -0.651580 |
| C | 6.282637  | -0.000169 | -0.000115 |
| H | 6.115763  | -2.044600 | 0.651380  |
| C | -2.723277 | 0.000116  | 0.000061  |
| C | -1.158976 | -3.008354 | 1.381864  |
| C | -2.055641 | -2.897651 | -0.975215 |
| H | 0.530477  | -4.313017 | -0.145161 |
| H | 0.382978  | -3.393338 | -1.676060 |
| C | -1.158931 | 3.008293  | -1.381395 |
| C | -2.055469 | 2.897590  | 0.975727  |
| H | 0.530680  | 4.312933  | 0.145519  |
| H | 0.383208  | 3.393299  | 1.676446  |
| H | 7.369063  | -0.000193 | -0.000198 |
| C | -3.450083 | -0.148305 | 1.189584  |
| C | -3.449685 | 0.148697  | -1.189685 |
| H | -2.140058 | -3.982310 | -1.108878 |
| H | -2.993864 | -2.535338 | -0.551254 |
| H | -0.271942 | -2.857428 | 2.004994  |
| H | -1.449609 | -4.063092 | 1.431882  |
| H | -1.981012 | -2.407762 | 1.780763  |
| H | -1.913438 | -2.439703 | -1.958716 |
| H | -2.139967 | 3.982250  | 1.109331  |
| H | -2.993684 | 2.535170  | 0.551838  |
| H | -0.271927 | 2.857393  | -2.004571 |
| H | -1.449602 | 4.063020  | -1.431405 |
| H | -1.980969 | 2.407668  | -1.780242 |
| H | -1.913174 | 2.439710  | 1.959246  |
| H | -2.917669 | -0.250389 | 2.133282  |
| C | -4.843088 | -0.150571 | 1.194292  |
| H | -2.916952 | 0.250760  | -2.133203 |
| C | -4.842685 | 0.151125  | -1.194847 |
| H | -5.381748 | -0.266280 | 2.130206  |
| C | -5.543005 | 0.000304  | -0.000393 |
| H | -5.381029 | 0.266929  | -2.130930 |
| H | -6.628801 | 0.000370  | -0.000566 |
| H | 0.490188  | -2.746430 | 2.984114  |

==== 3a ====

|   |           |           |           |
|---|-----------|-----------|-----------|
| C | -0.286889 | -0.065585 | -4.038686 |
| C | 0.812184  | -0.420798 | -3.372599 |
| H | -0.832190 | 0.833334  | -3.772703 |
| H | -0.686477 | -0.646501 | -4.864672 |
| H | 1.149333  | 0.214195  | -2.554011 |

|   |          |           |           |
|---|----------|-----------|-----------|
| C | 1.653045 | -1.607416 | -3.615970 |
| C | 2.770708 | -1.819480 | -2.801586 |
| C | 1.384535 | -2.538246 | -4.628785 |
| C | 3.597296 | -2.923193 | -2.986224 |
| H | 2.991218 | -1.105239 | -2.011860 |
| C | 2.207416 | -3.640771 | -4.815418 |
| H | 0.524788 | -2.399052 | -5.277359 |
| C | 3.317804 | -3.839143 | -3.995149 |
| H | 4.459004 | -3.066875 | -2.341310 |
| H | 1.983115 | -4.350993 | -5.605737 |
| H | 3.959288 | -4.702234 | -4.144558 |

==== RCA ====

|   |           |           |           |
|---|-----------|-----------|-----------|
| B | 2.020485  | 0.271748  | 0.569896  |
| C | 3.591367  | 0.355722  | 0.631918  |
| C | 1.229609  | -0.993150 | 0.417843  |
| C | 1.076893  | 1.427922  | 0.544756  |
| C | 4.271645  | 1.566386  | 0.404142  |
| C | 4.390490  | -0.779453 | 0.867056  |
| N | -0.130500 | -1.067835 | 0.246118  |
| O | 1.764678  | -2.234956 | 0.424064  |
| N | -0.293566 | 1.342136  | 0.401740  |
| O | 1.447270  | 2.732870  | 0.637377  |
| H | 3.699461  | 2.468234  | 0.210857  |
| C | 5.661219  | 1.642999  | 0.415934  |
| H | 3.913108  | -1.737099 | 1.048235  |
| C | 5.781246  | -0.709044 | 0.878712  |
| B | -0.976673 | 0.092334  | 0.227954  |
| C | -0.550815 | -2.498193 | 0.214159  |
| C | 0.802014  | -3.152699 | -0.085003 |
| C | -0.856516 | 2.714020  | 0.261194  |
| C | 0.288292  | 3.513619  | 0.887445  |
| H | 6.149342  | 2.597287  | 0.235847  |
| C | 6.426195  | 0.504064  | 0.653267  |
| H | 6.363601  | -1.606838 | 1.070176  |
| C | -2.544605 | 0.005402  | 0.068198  |
| C | -1.062430 | -2.908852 | 1.595001  |
| C | -1.557225 | -2.825532 | -0.883681 |
| H | 0.932047  | -4.110696 | 0.423204  |
| H | 0.963396  | -3.273893 | -1.162748 |
| C | -1.003065 | 3.042972  | -1.225054 |
| C | -2.157015 | 2.959844  | 1.017389  |
| H | 0.421685  | 4.498753  | 0.435621  |
| H | 0.150523  | 3.617984  | 1.972313  |
| H | 7.511002  | 0.561281  | 0.662697  |
| C | -3.373413 | -0.127954 | 1.190976  |
| C | -3.159491 | 0.079746  | -1.189672 |
| H | -1.533942 | -3.905032 | -1.072403 |
| H | -2.575210 | -2.551117 | -0.601208 |
| H | -0.295766 | -2.729274 | 2.355502  |
| H | -1.315794 | -3.974420 | 1.597318  |
| H | -1.961722 | -2.343917 | 1.854086  |
| H | -1.291998 | -2.306466 | -1.810309 |
| H | -2.309828 | 4.041858  | 1.104160  |
| H | -3.020118 | 2.536384  | 0.500960  |
| H | -0.041224 | 2.932087  | -1.738011 |
| H | -1.353346 | 4.072667  | -1.354106 |
| H | -1.733162 | 2.370732  | -1.685120 |
| H | -2.106688 | 2.536769  | 2.025028  |
| H | -2.927513 | -0.175313 | 2.182792  |
| C | -4.759753 | -0.181173 | 1.068298  |
| H | -2.538651 | 0.155360  | -2.080688 |
| C | -4.545457 | 0.032170  | -1.321112 |
| H | -5.379659 | -0.281622 | 1.954447  |









## 5. References

- [1] a) Hammett, L. P. *J. Am. Chem. Soc.* **1937**, *59*, 96 – 103; b) Hansch, C.; Leo, A.; Taft, R. W. *Chem. Rev.* **1991**, *91*, 165 – 195; c) Brown, T. J.; Dichens, M. G.; Widenhoefer, R. A. *J. Am. Chem. Soc.* **2009**, *131*, 6350 – 6351.
- [2] G. M. Sheldrick, SHELXL-97, Program for Crystal Structure Refinement; University of Göttingen: Göttingen, Germany, **1997**.
- [3] Bruker AXS SHELXTL, Madison, WI; SHELX-97G. M. Sheldrick, *Acta Crystallogr. A*, **2008**, *64*, 112–122, SHELX-2013, <http://shelx.uni-ac.gwdg.de/SHELX/index.php>.
- [4] Complete List of Authors of Gaussian 09 (Gaussian 09, Revision B.01); M. J. Frisch, G. W. Trucks, H. B. Schlegel, G. E. Scuseria, M. A. Robb, J. R. Cheeseman, G. Scalmani, V. Barone, B. Mennucci, G. A. Petersson, H. Nakatsuji, M. Caricato, X. Li, H. P. Hratchian, A. F. Izmaylov, J. Bloino, G. Zheng, J. L. Sonnenberg, M. Hada, M. Ehara, K. Toyota, R. Fukuda, J. Hasegawa, M. Ishida, T. Nakajima, Y. Honda, O. Kitao, H. Nakai, T. Vreven, J. A. Montgomery, Jr., J. E. Peralta, F. Ogliaro, M. Bearpark, J. J. Heyd, E. Brothers, K. N. Kudin, V. N. Staroverov, T. Keith, R. Kobayashi, J. Normand, K. Raghavachari, A. Rendell, J. C. Burant, S. S. Iyengar, J. Tomasi, M. Cossi, N. Rega, J. M. Millam, M. Klene, J. E. Knox, J. B. Cross, V. Bakken, C. Adamo, J. Jaramillo, R. Gomperts, R. E. Stratmann, O. Yazyev, A. J. Austin, R. Cammi, C. Pomelli, J. W. Ochterski, R. L. Martin, K. Morokuma, V. G. Zakrzewski, G. A. Voth, P. Salvador, J. J. Dannenberg, S. Dapprich, A. D. Daniels, O. Farkas, J. B. Foresman, J. V. Ortiz, J. Cioslowski, and D. J. Fox, Gaussian, Inc., Wallingford CT, 2010.
- [5] Zhao, Y.; Truhlar, D. G. *Theor. Chem. Acc.* **2008**, *120*, 215 – 241.
- [6] a) Hehre, W. R.; Schleyer, P. v. R.; Pople, J. A. *Ab Initio Molecular Orbital Theory*, John Wiley & Sons, New York, **1986**.
- [7] Tomasi, J.; Mennucci, B.; Cammi, R. *Chem. Rev.* **2005**, *105*, 2999.
- [8] Weigend, F.; Ahlrichs, R. *Phys. Chem. Chem. Phys.* **2005**, *7*, 3297.

## 5. NMR spectra

### Compound 2

#### $^1\text{H}$ NMR

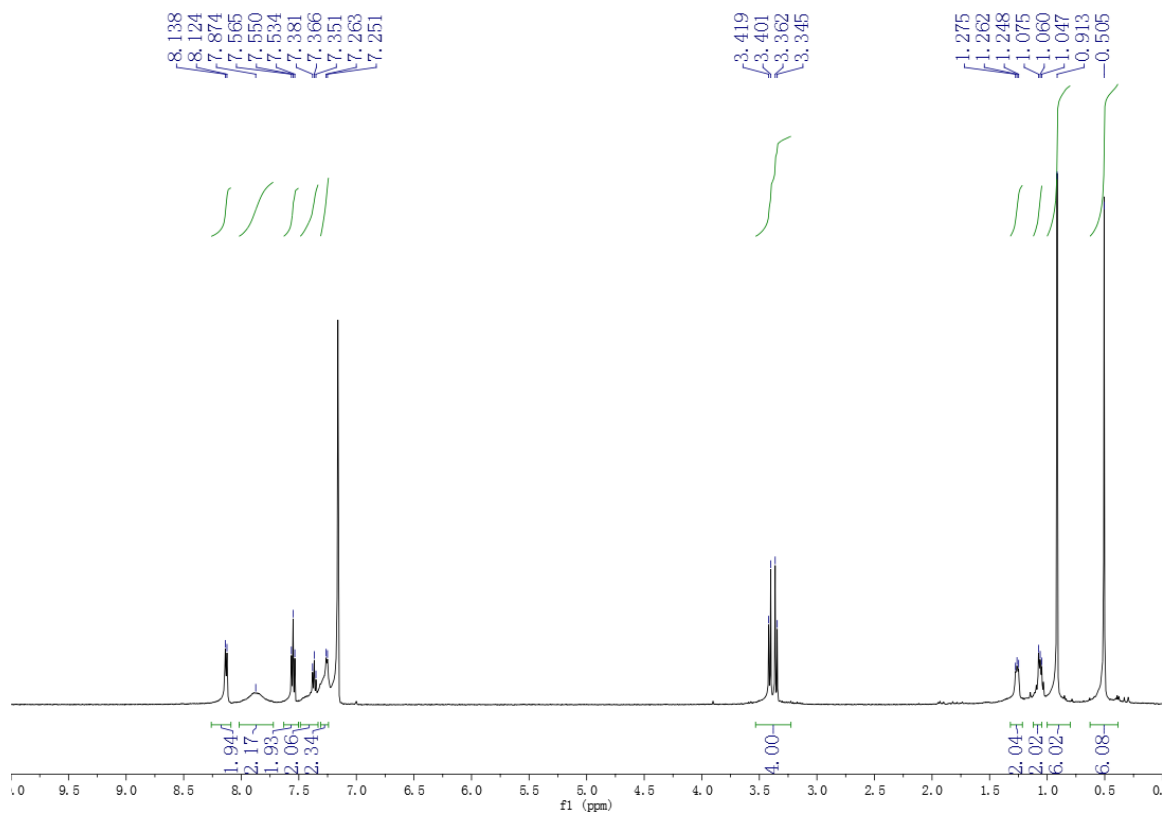

#### $^{13}\text{C}$ NMR

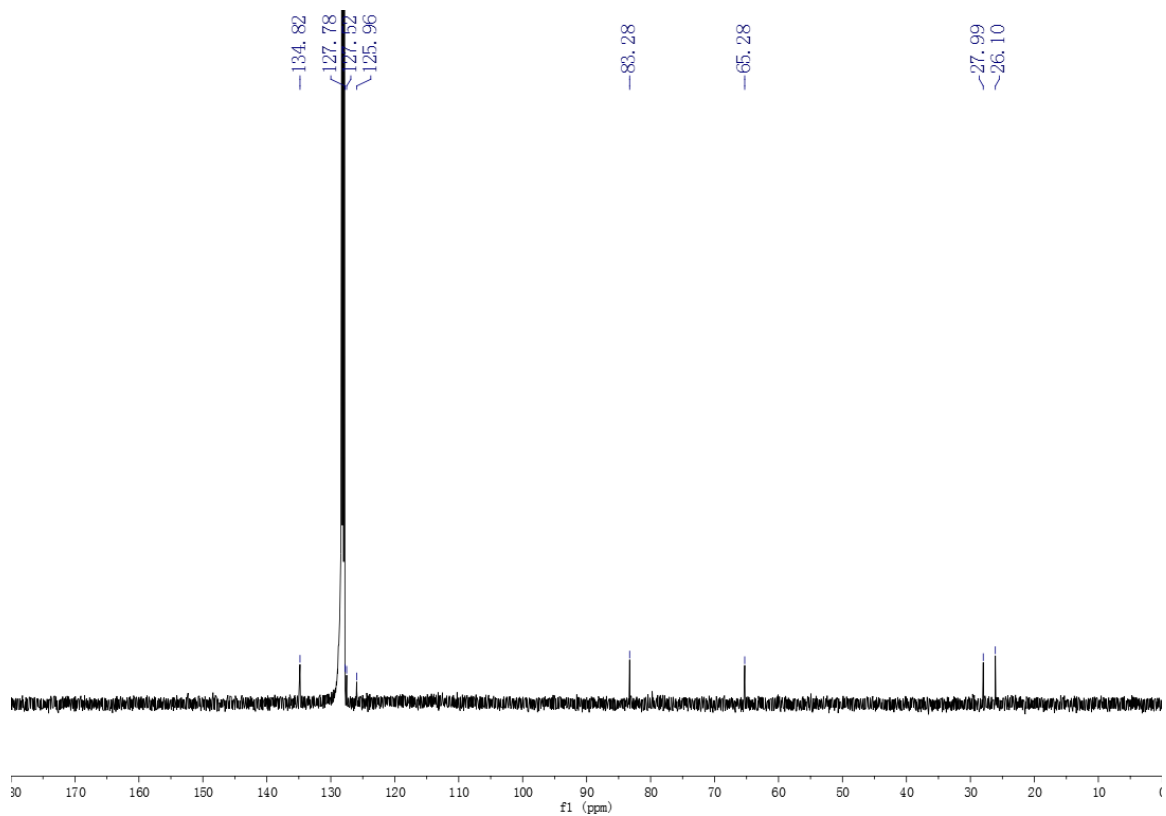

$^{13}\text{C}$  NMR (DEPT 135)

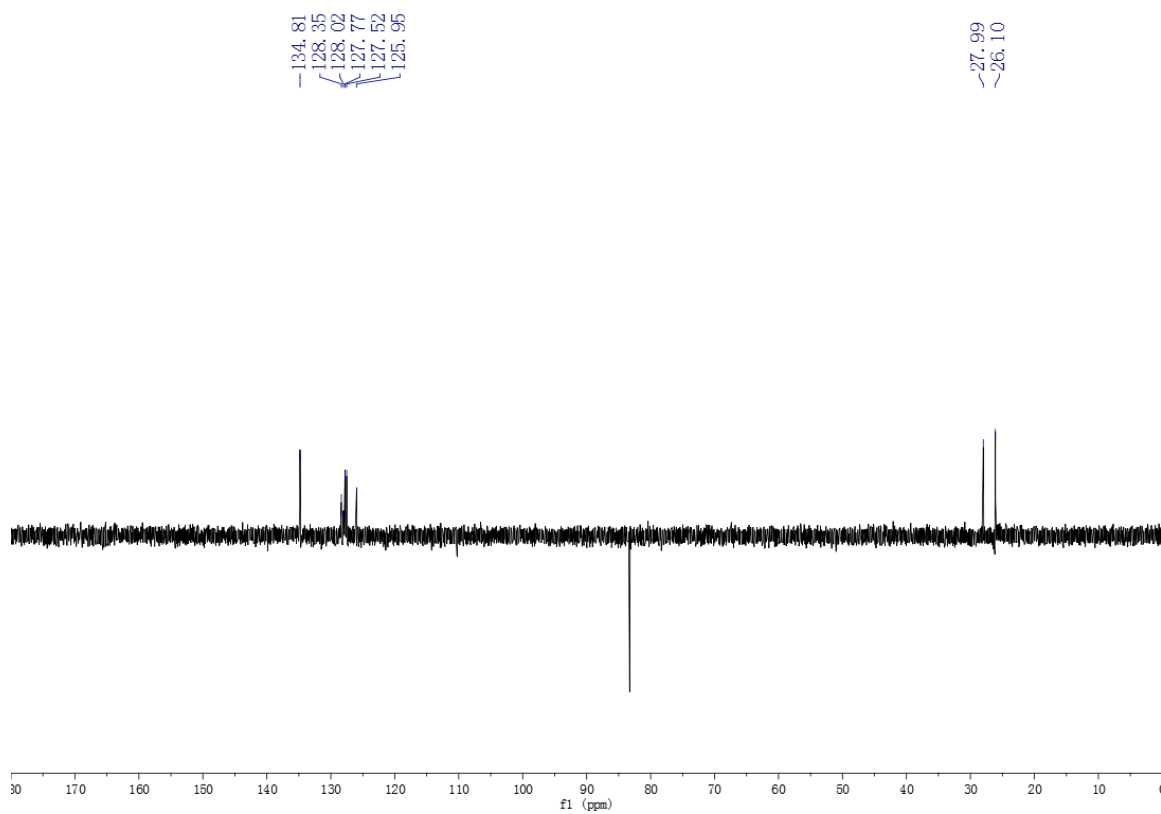

$^{11}\text{B}$  NMR

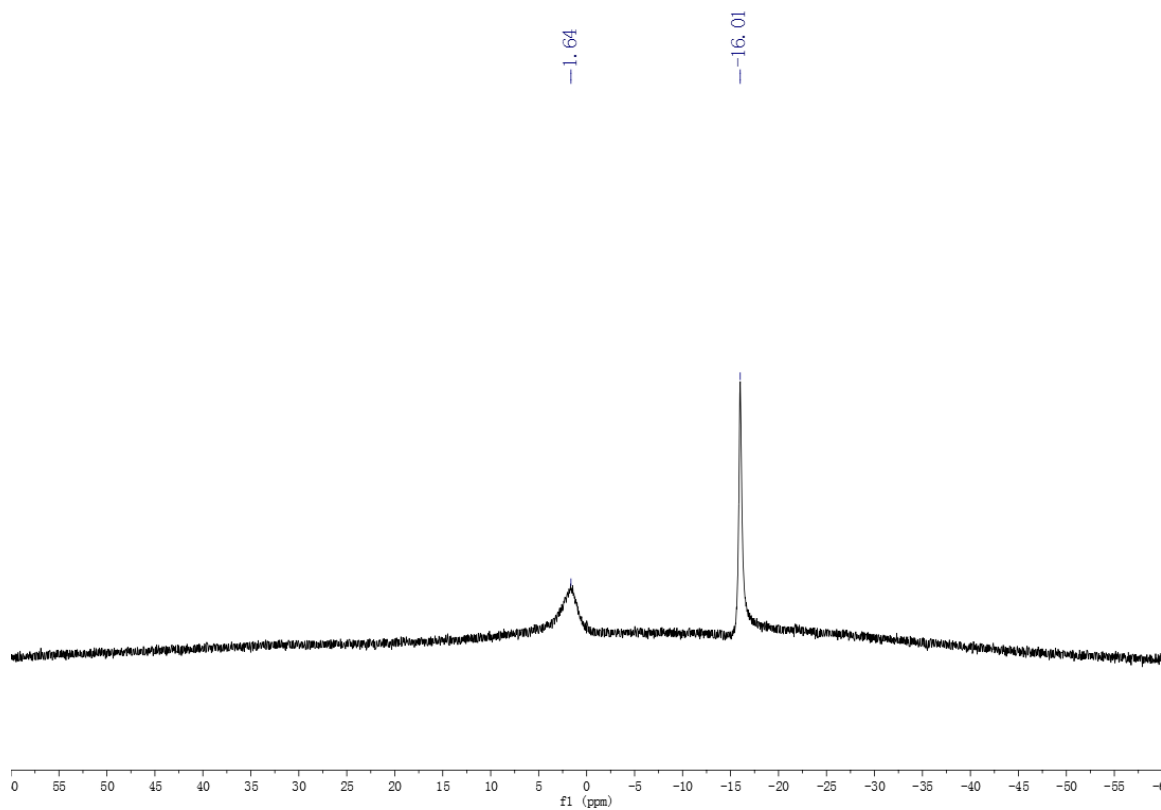

# Compound 4a

## <sup>1</sup>H NMR

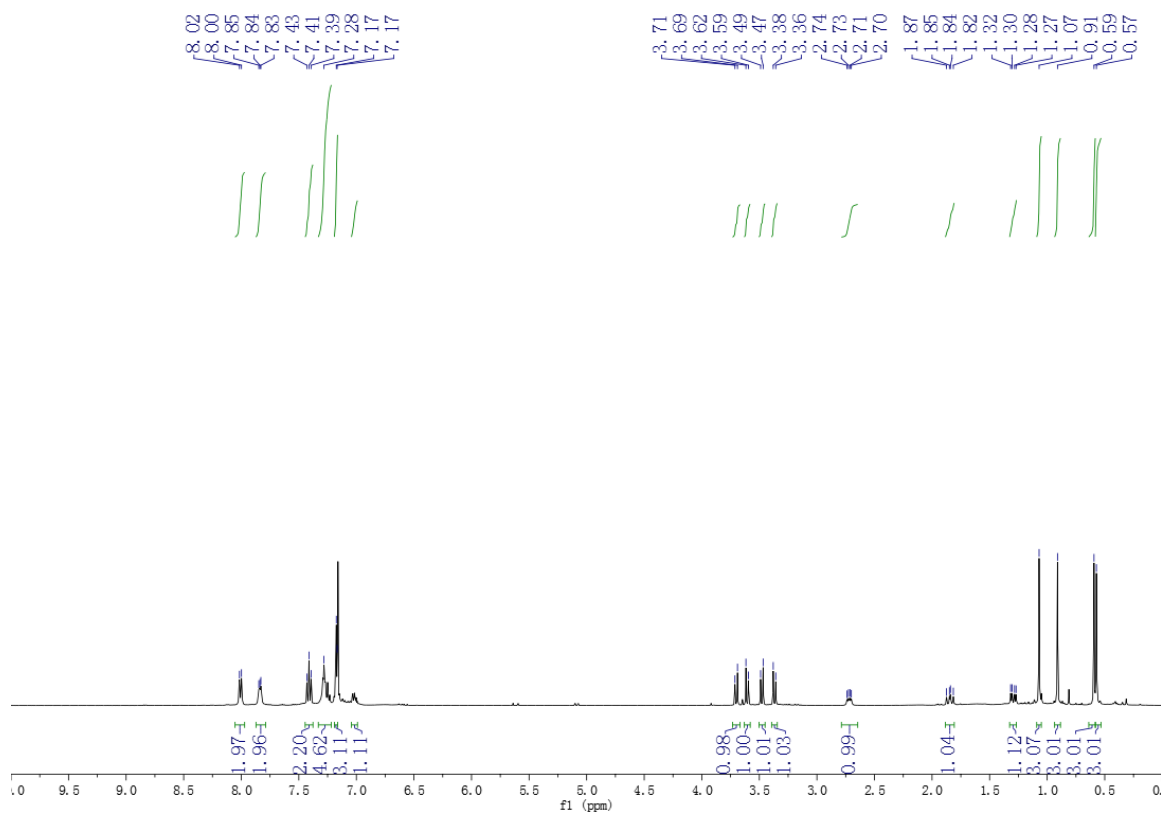

## <sup>13</sup>C NMR

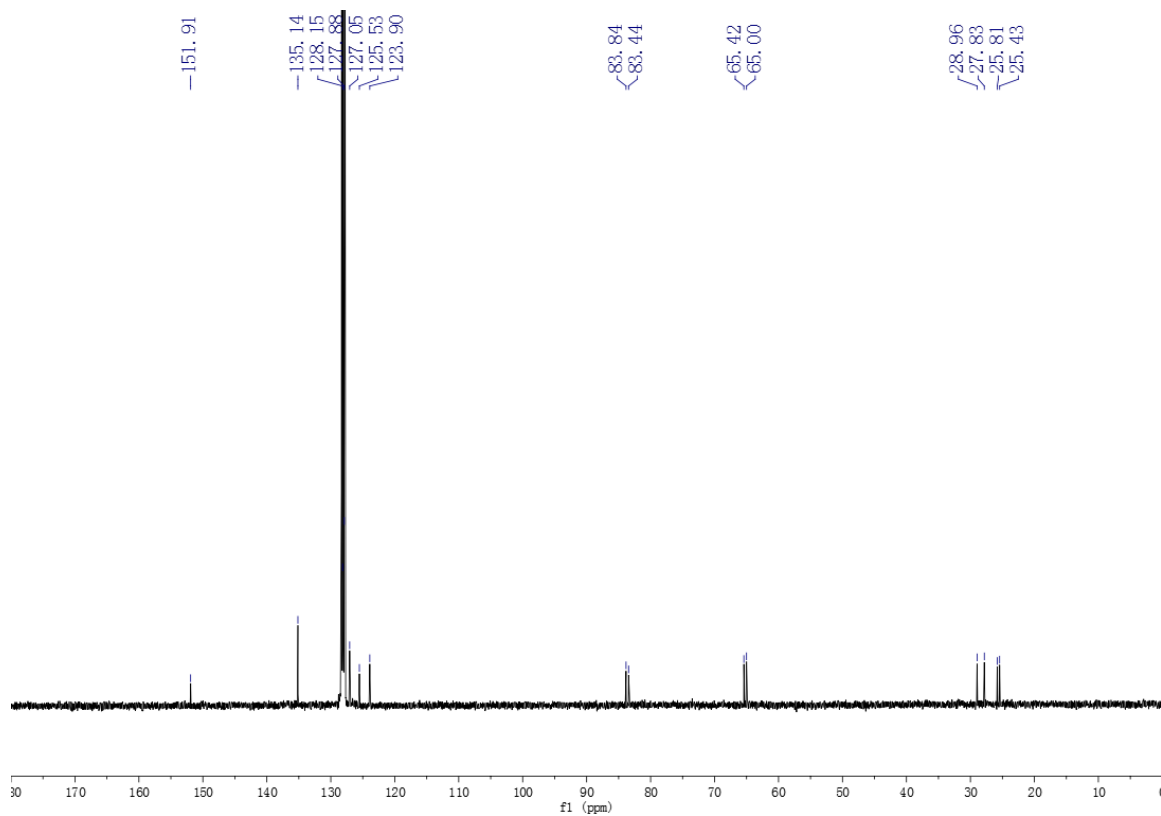

$^{13}\text{C}$  NMR (DEPT 135)

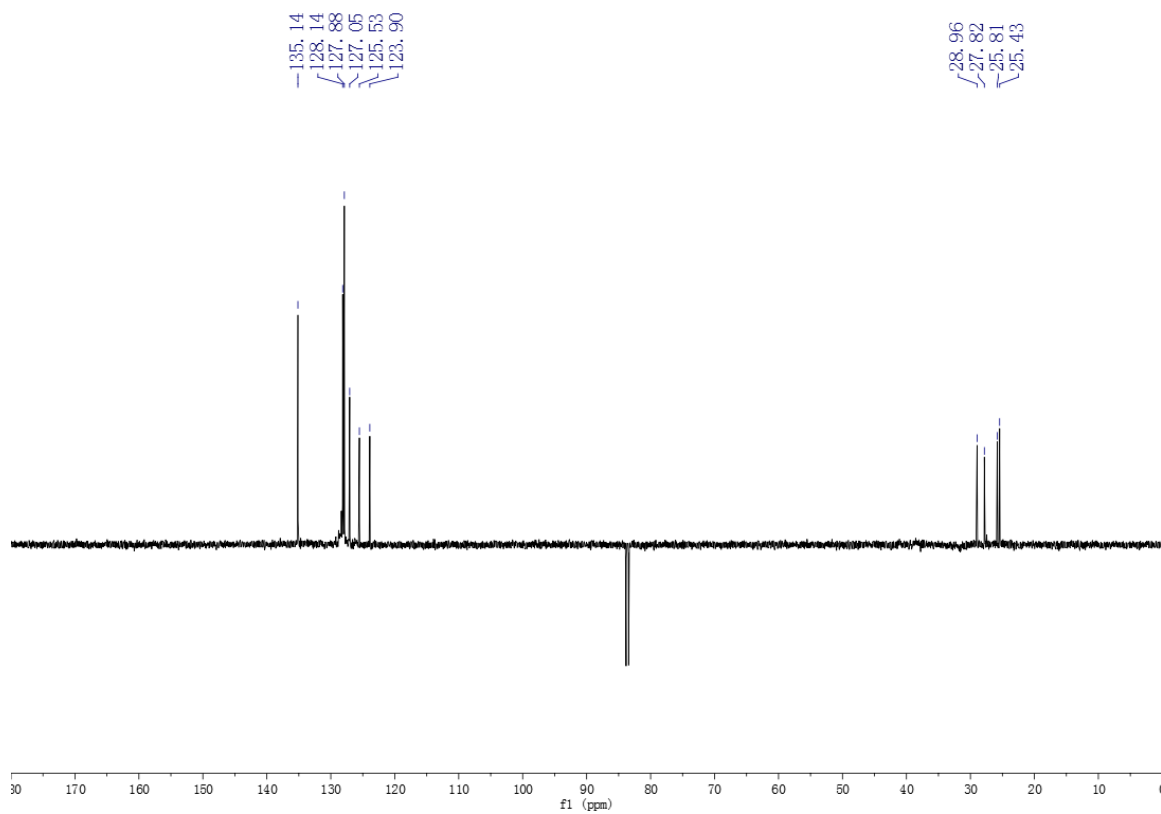

$^{11}\text{B}$  NMR

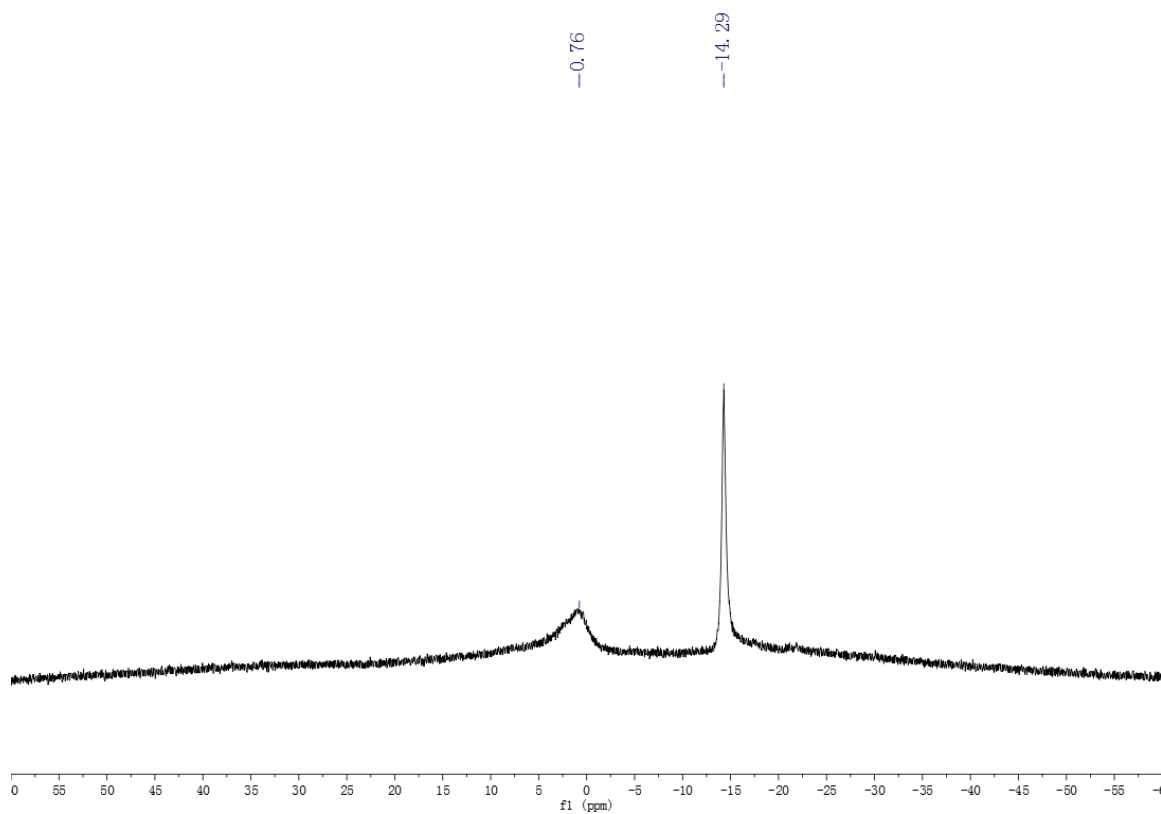



# Compound 4b

## <sup>1</sup>H NMR

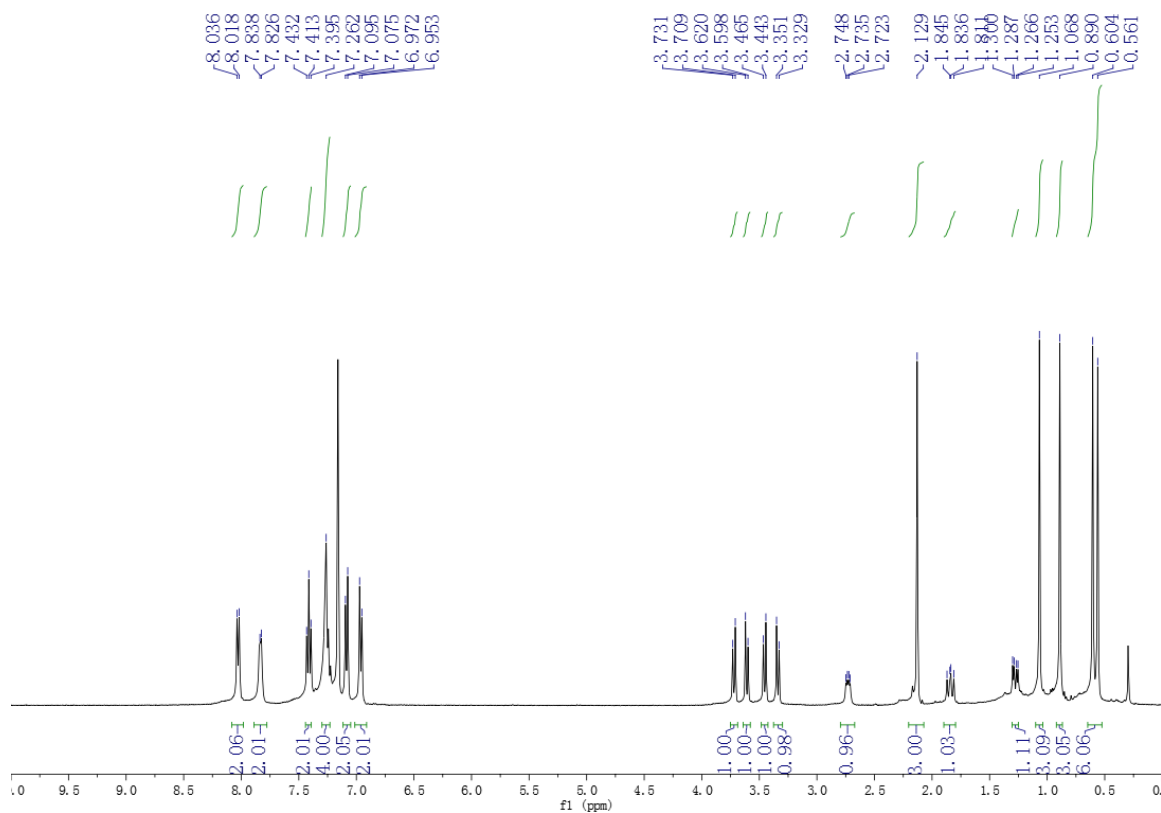

## <sup>13</sup>C NMR

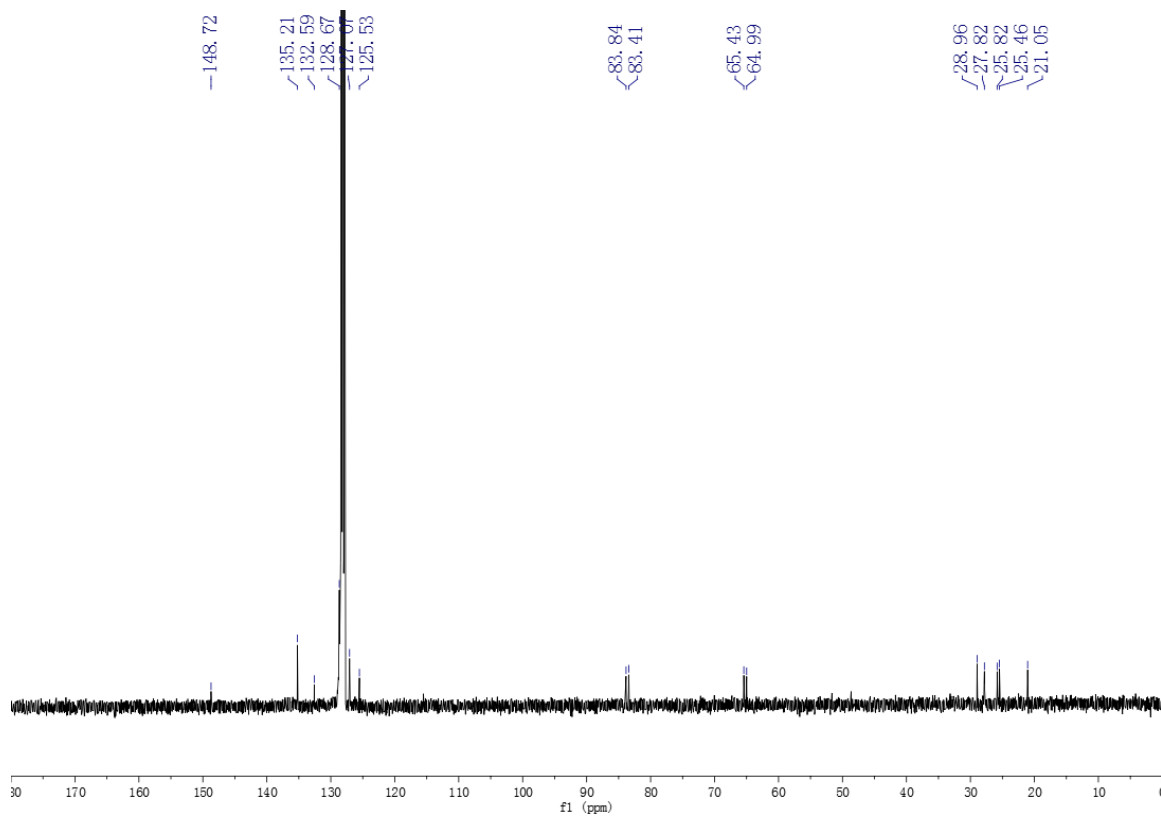

$^{13}\text{C}$  NMR (DEPT 135)

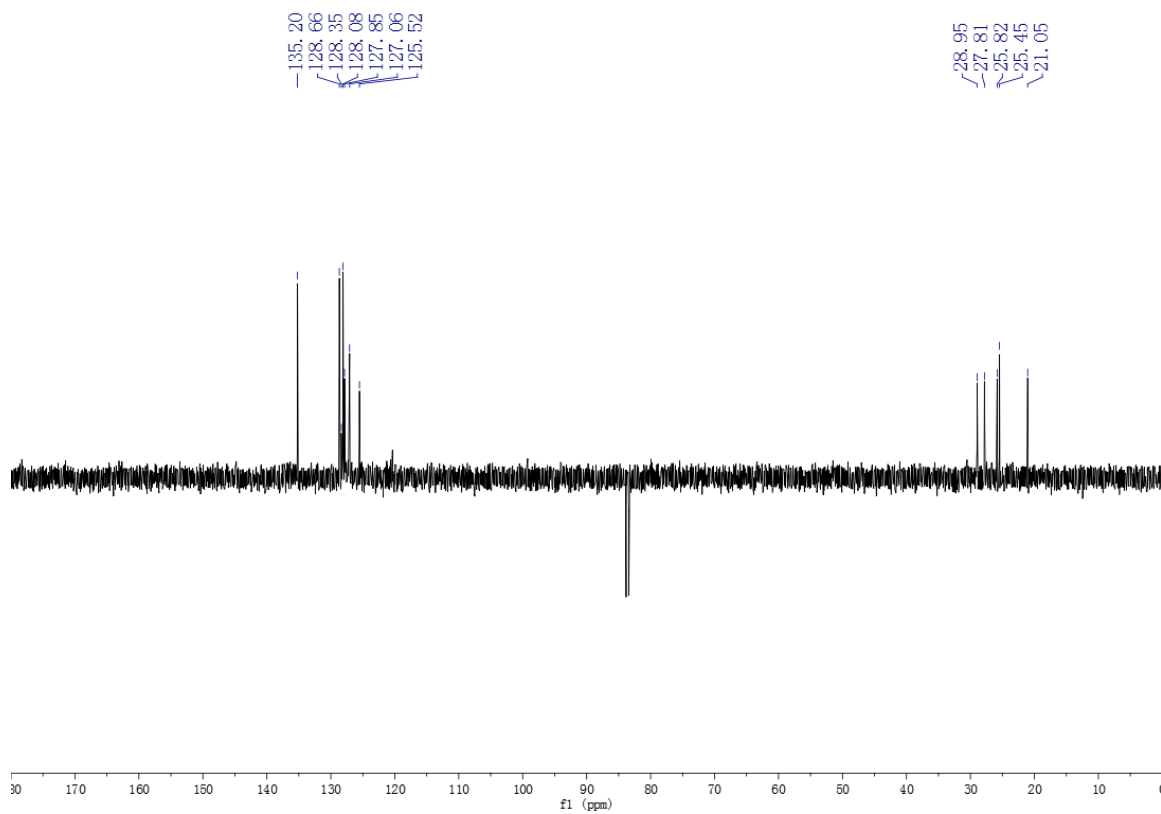

$^{11}\text{B}$  NMR

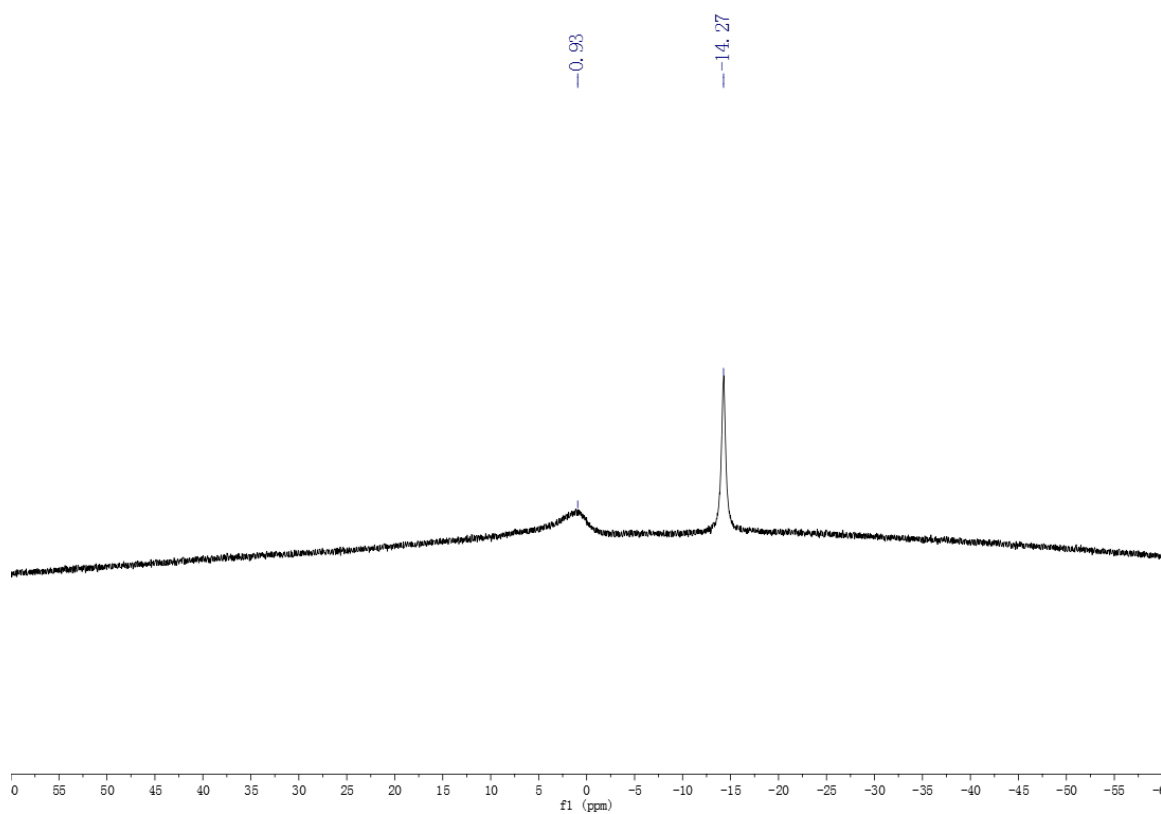

# Compound 4c

## <sup>1</sup>H NMR

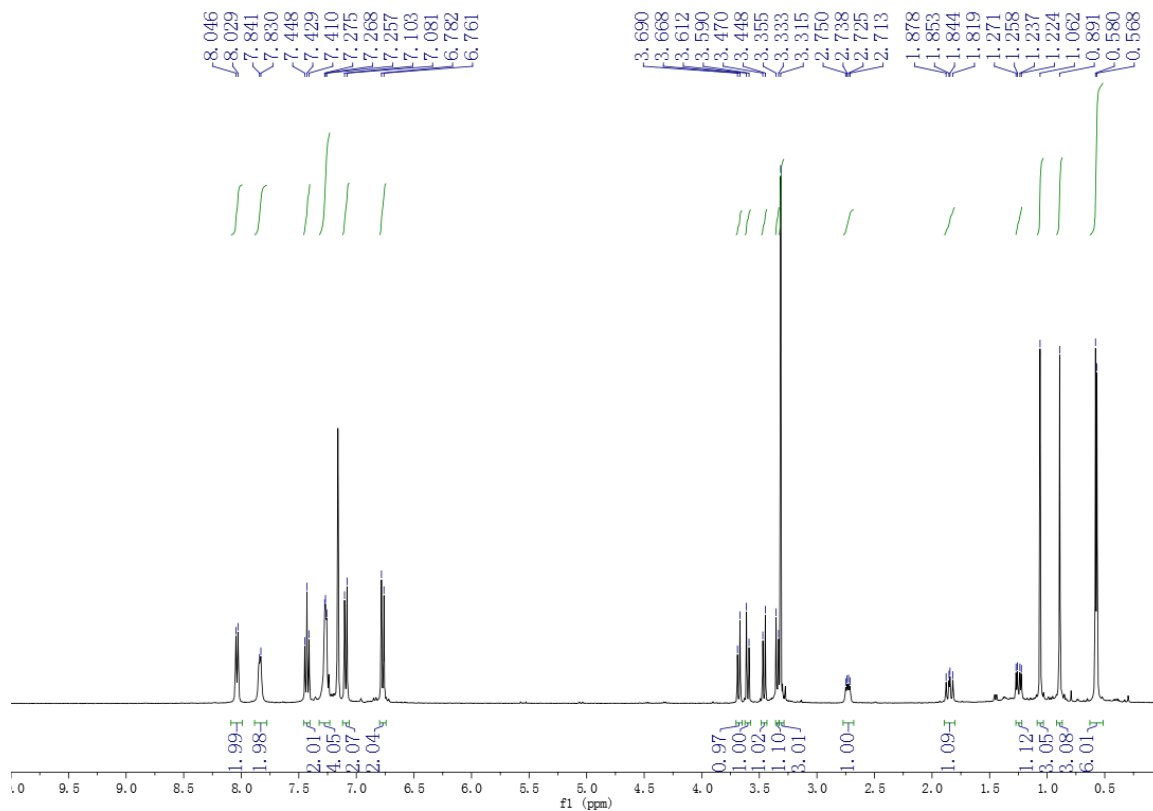

## <sup>13</sup>C NMR

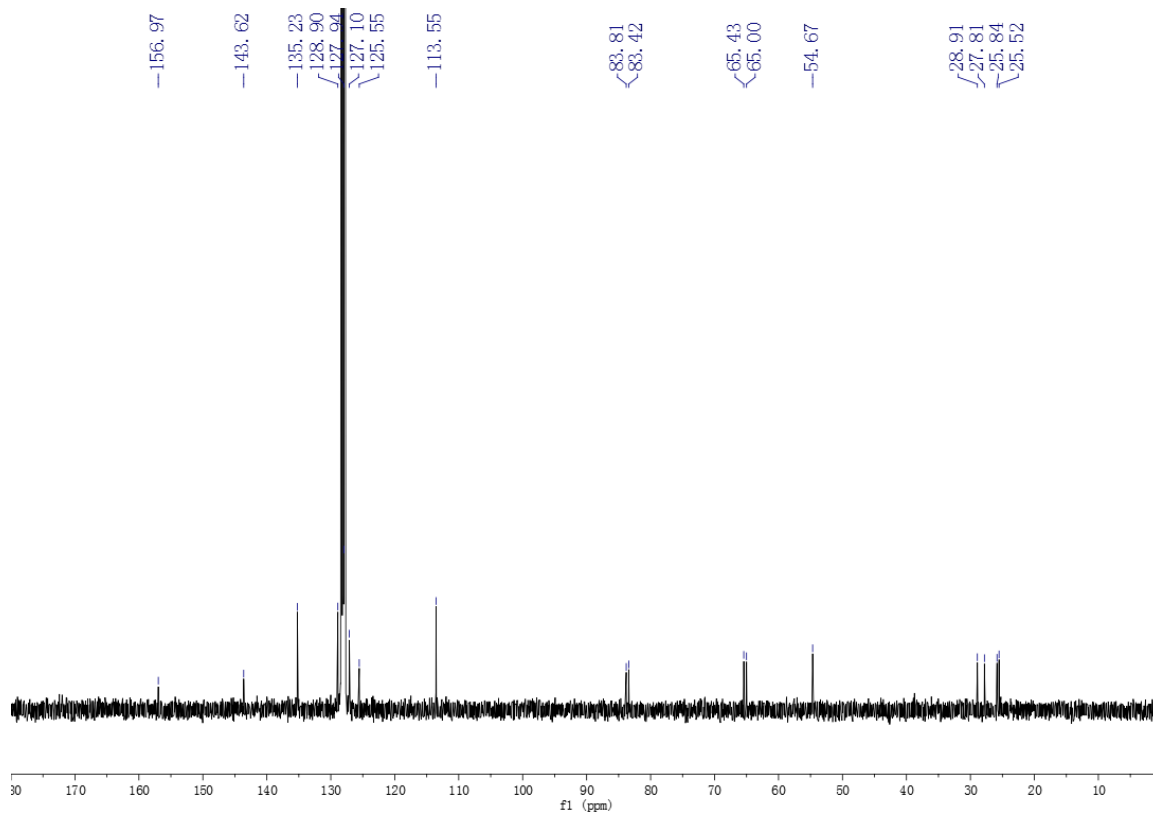

$^{13}\text{C}$  NMR (DEPT 135)

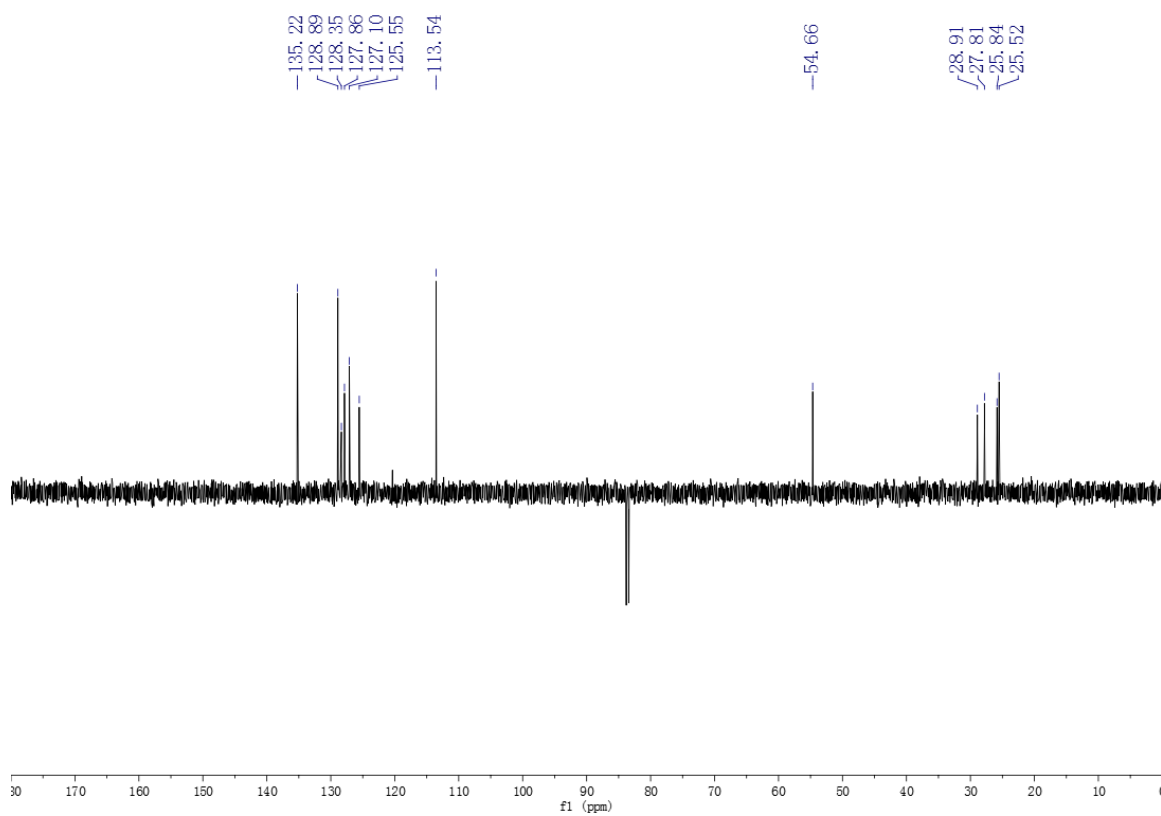

$^{11}\text{B}$  NMR

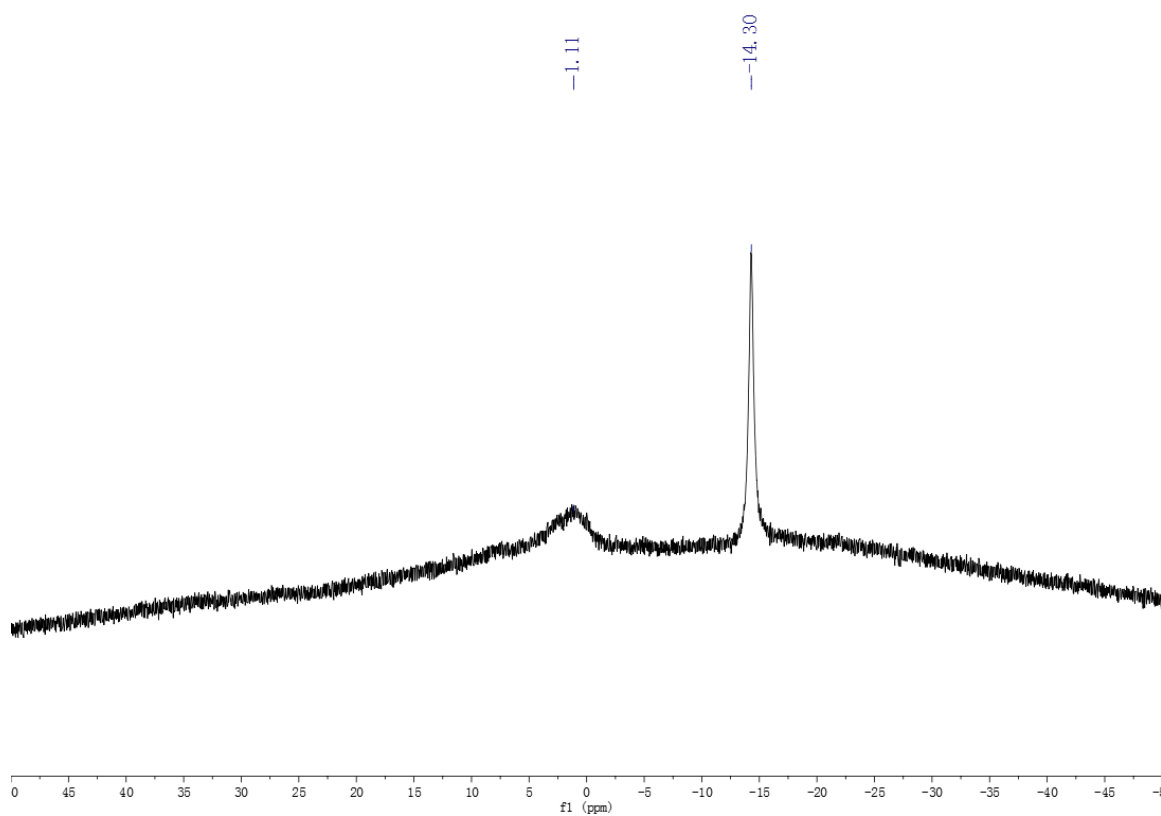

# Compound 4d

## <sup>1</sup>H NMR

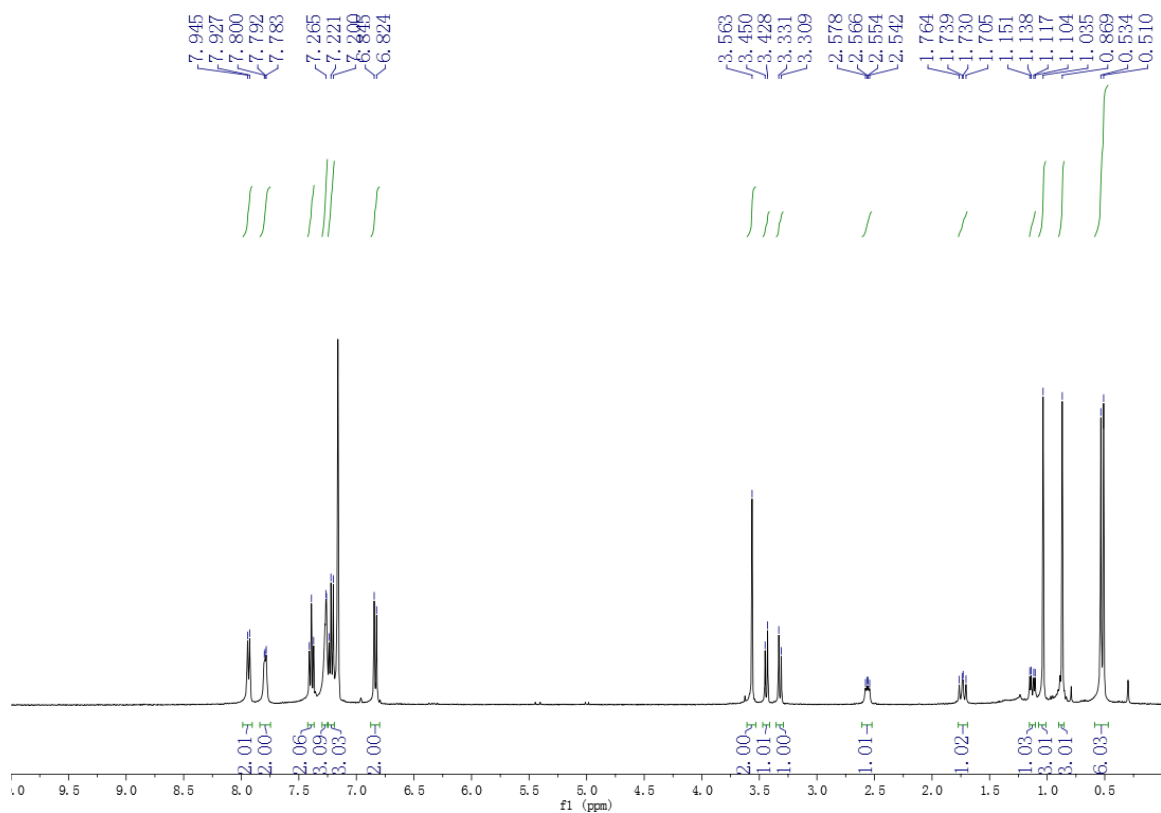

## <sup>13</sup>C NMR

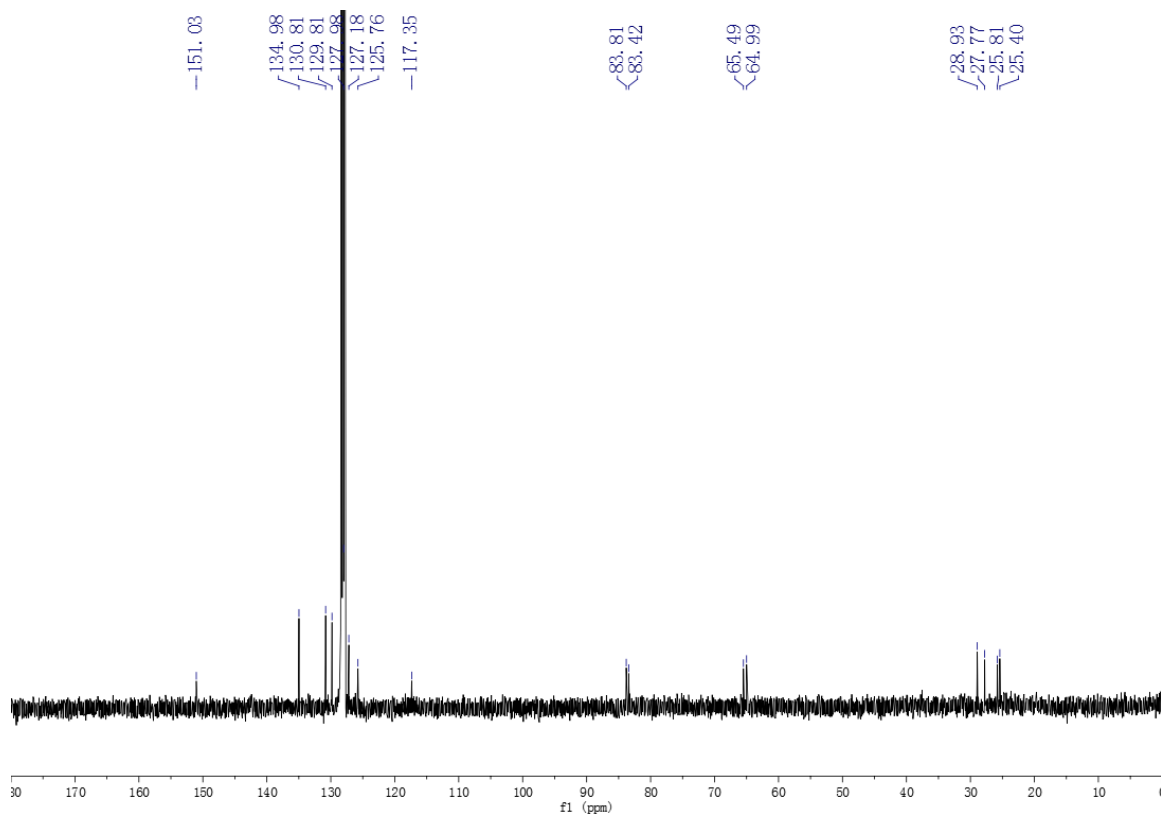

<sup>13</sup>C NMR (DEPT 135)

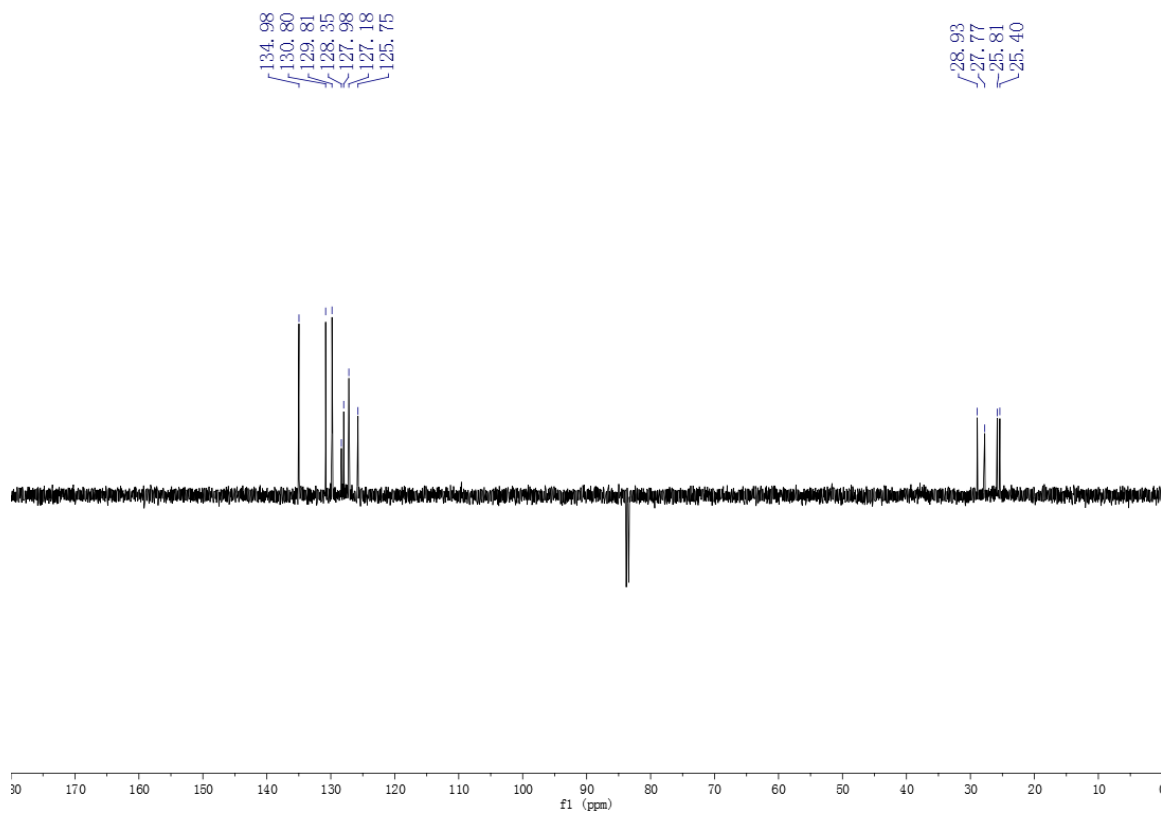

<sup>11</sup>B NMR

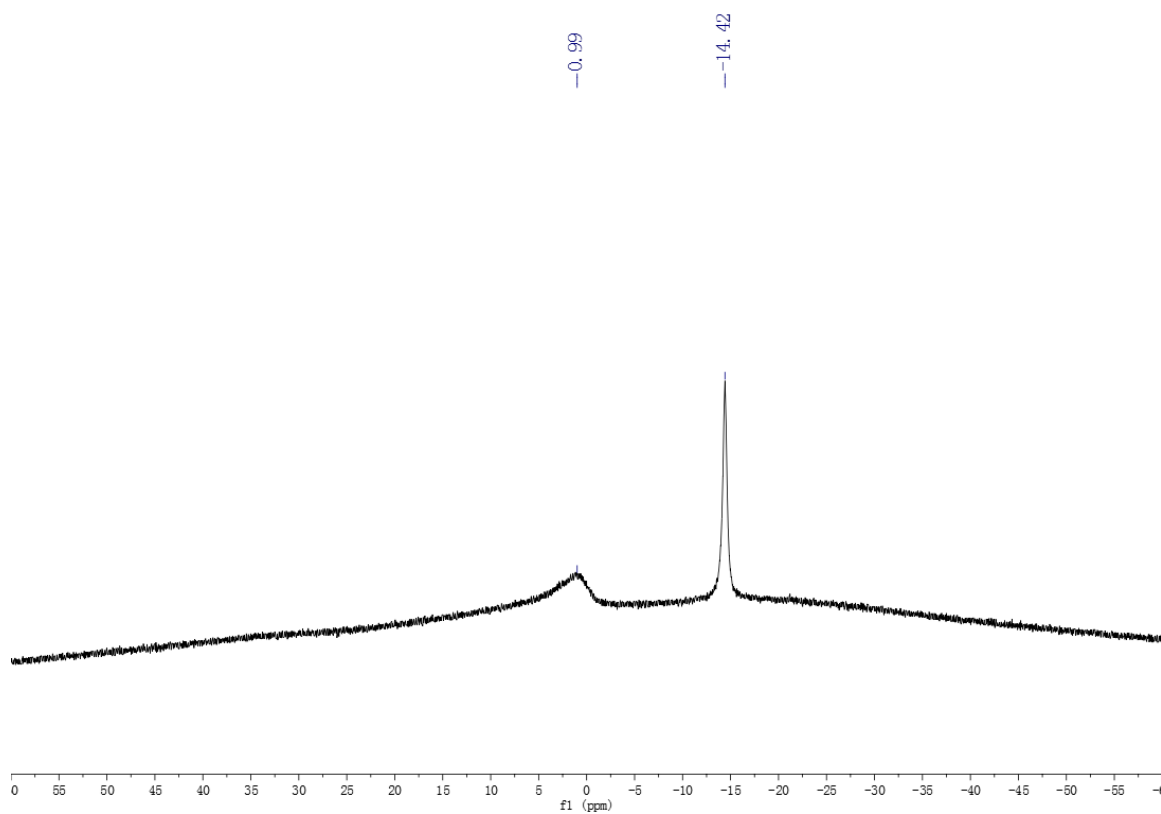

# Compound 4e

## <sup>1</sup>H NMR

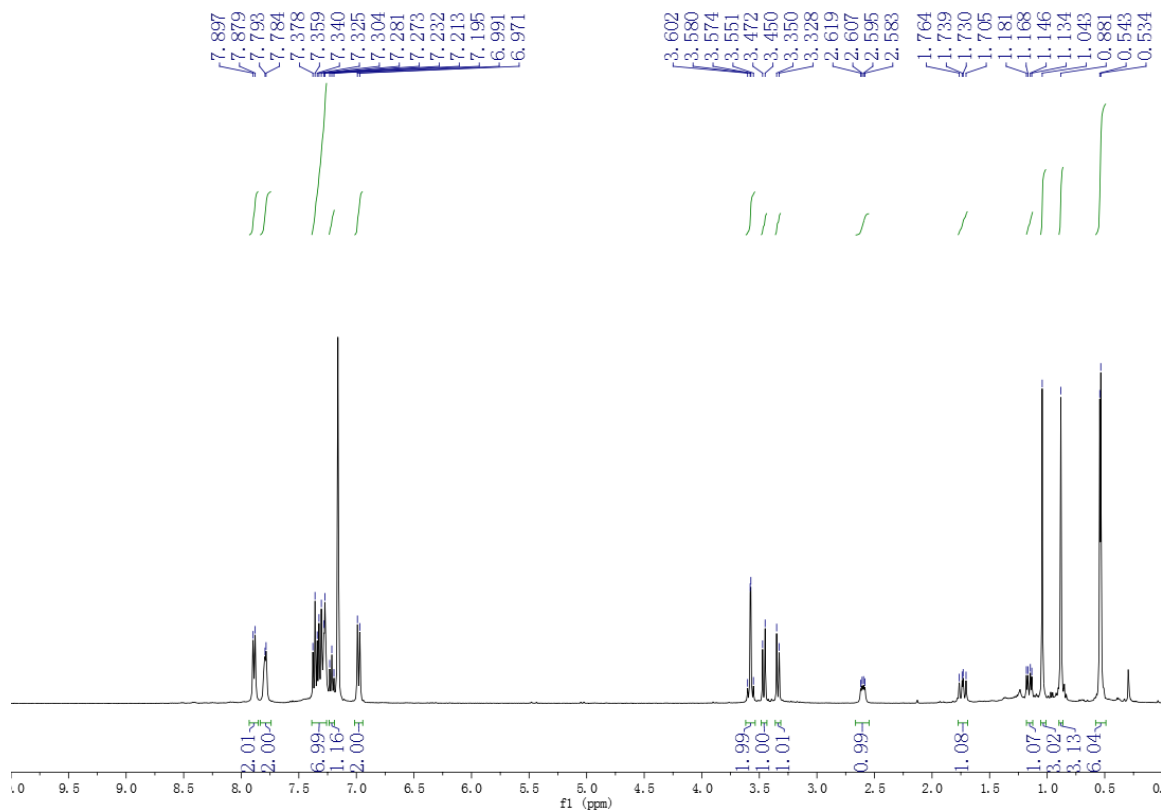

## <sup>13</sup>C NMR

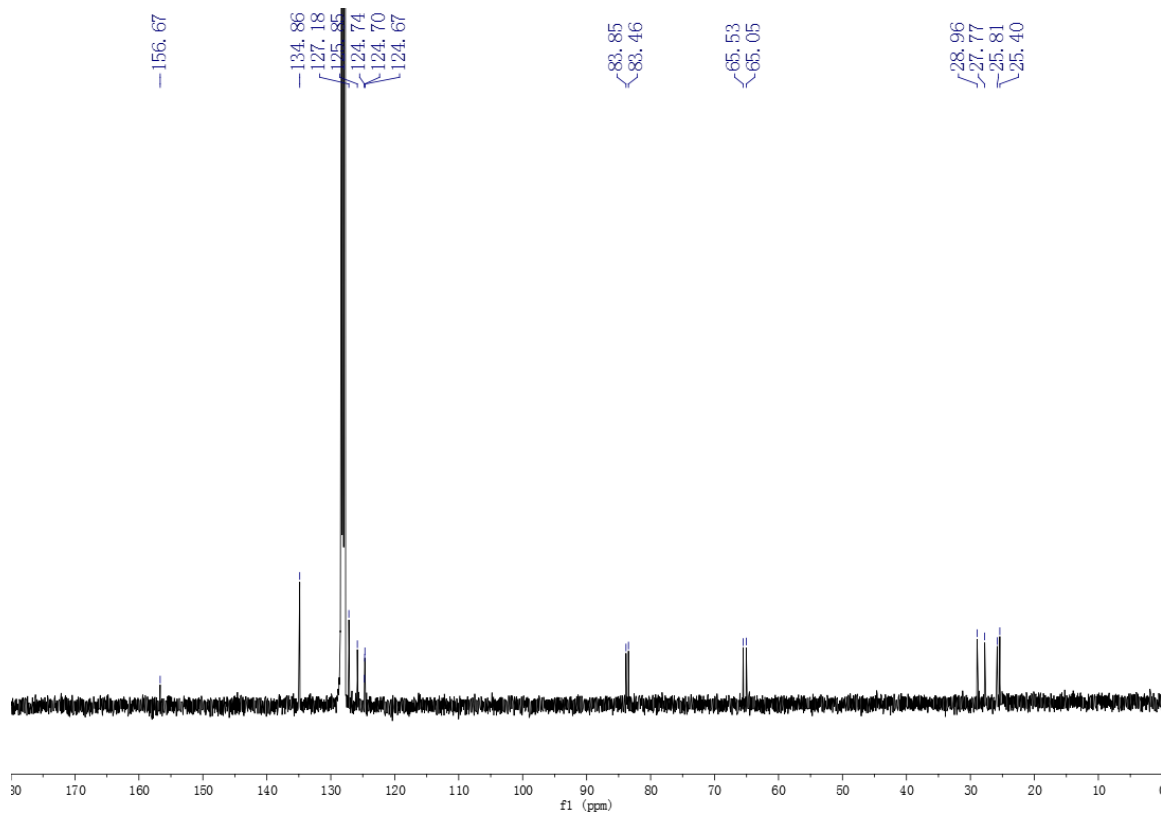

$^{13}\text{C}$  NMR (DEPT 135)

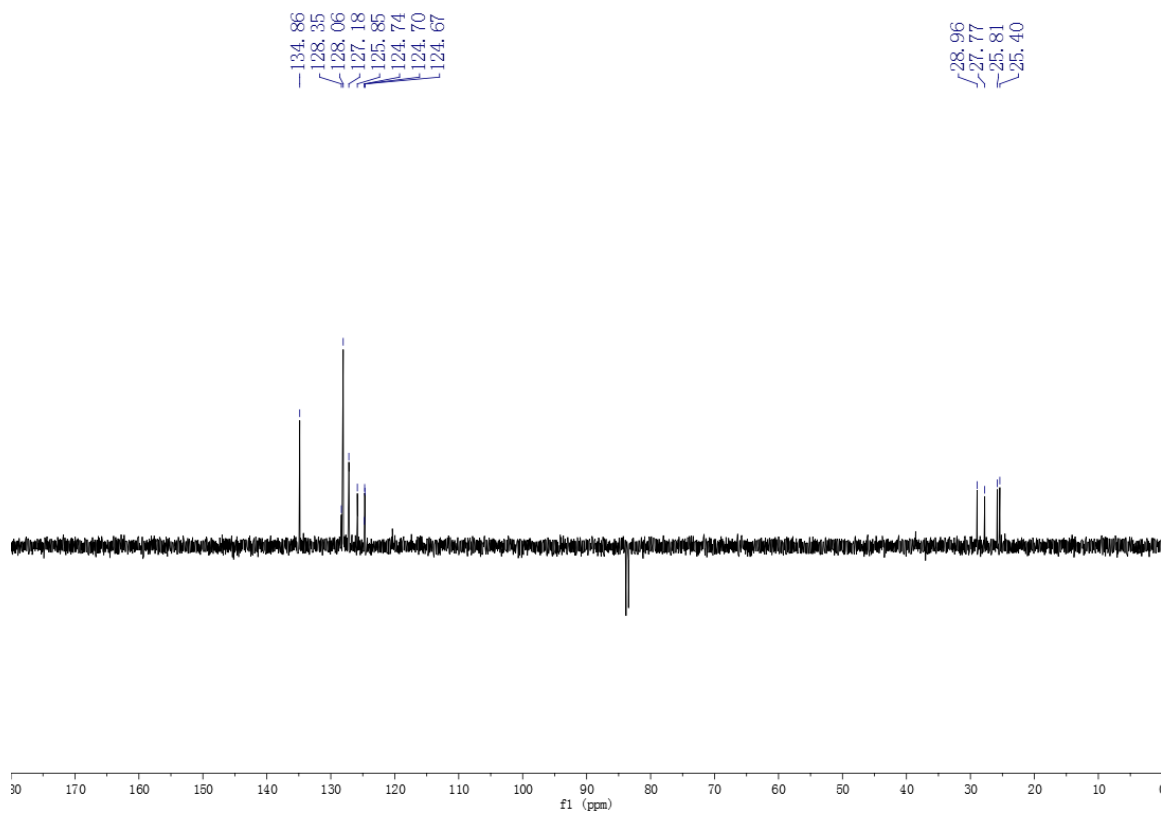

$^{11}\text{B}$  NMR

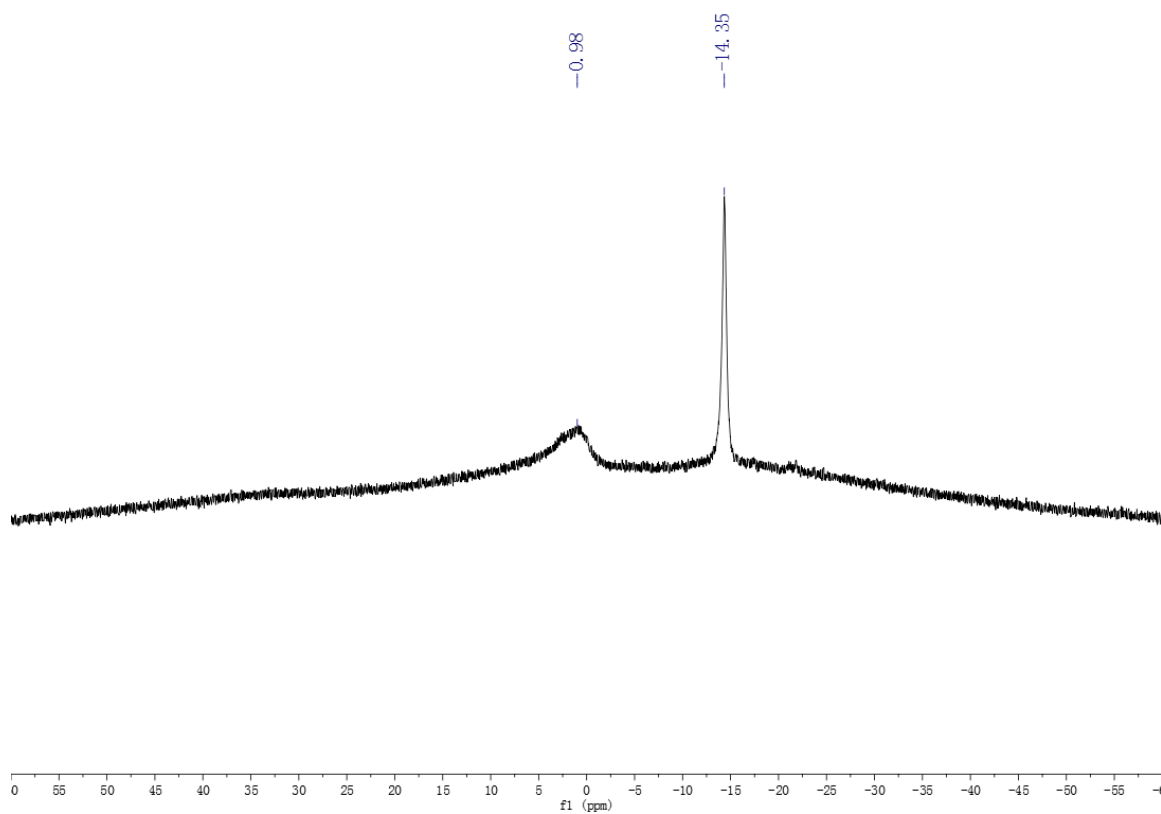



<sup>19</sup>F NMR

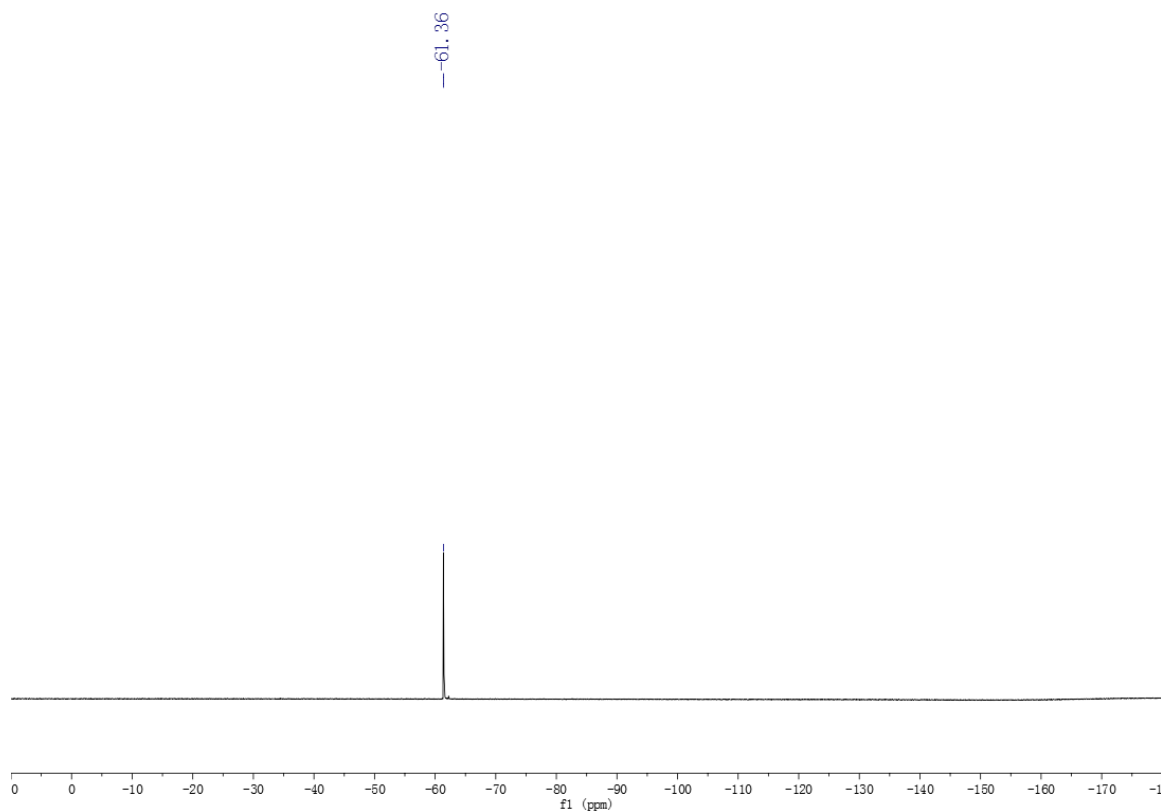

**Compound 6**

<sup>1</sup>H NMR

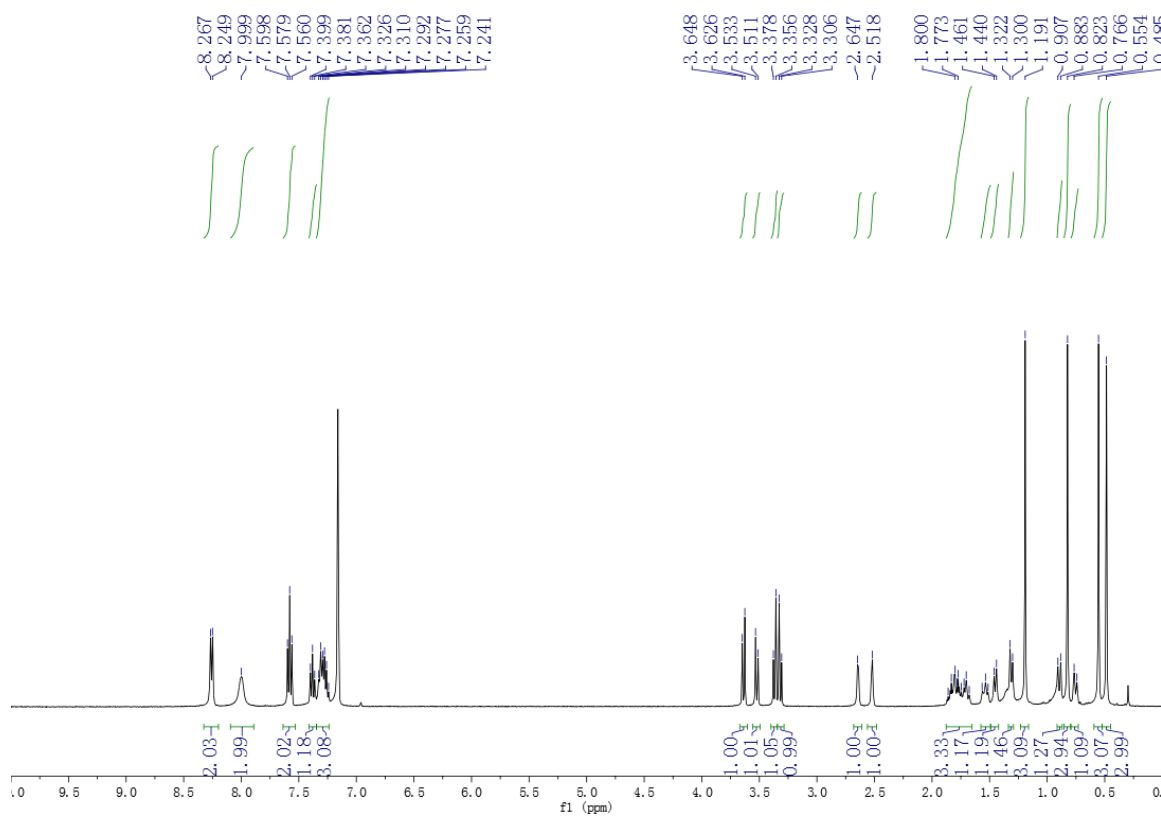

$^{13}\text{C}$  NMR

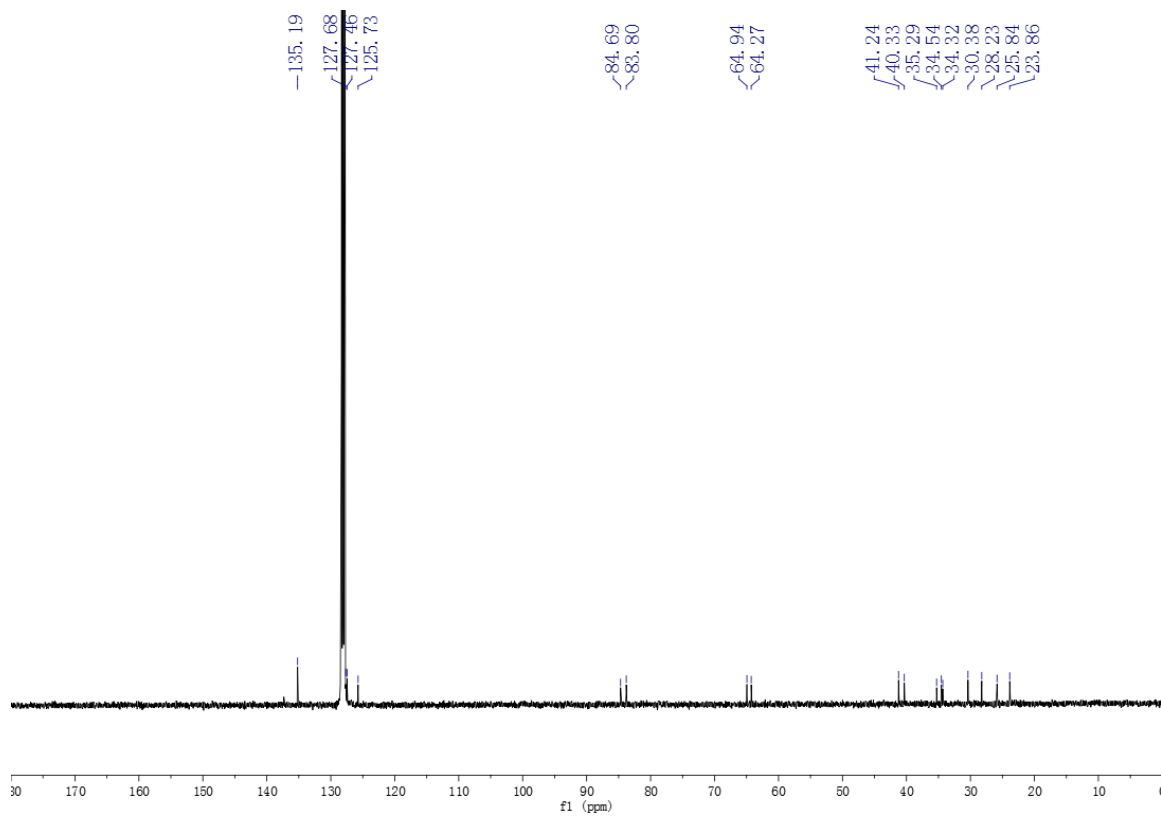

$^{13}\text{C}$  NMR (DEPT 135)

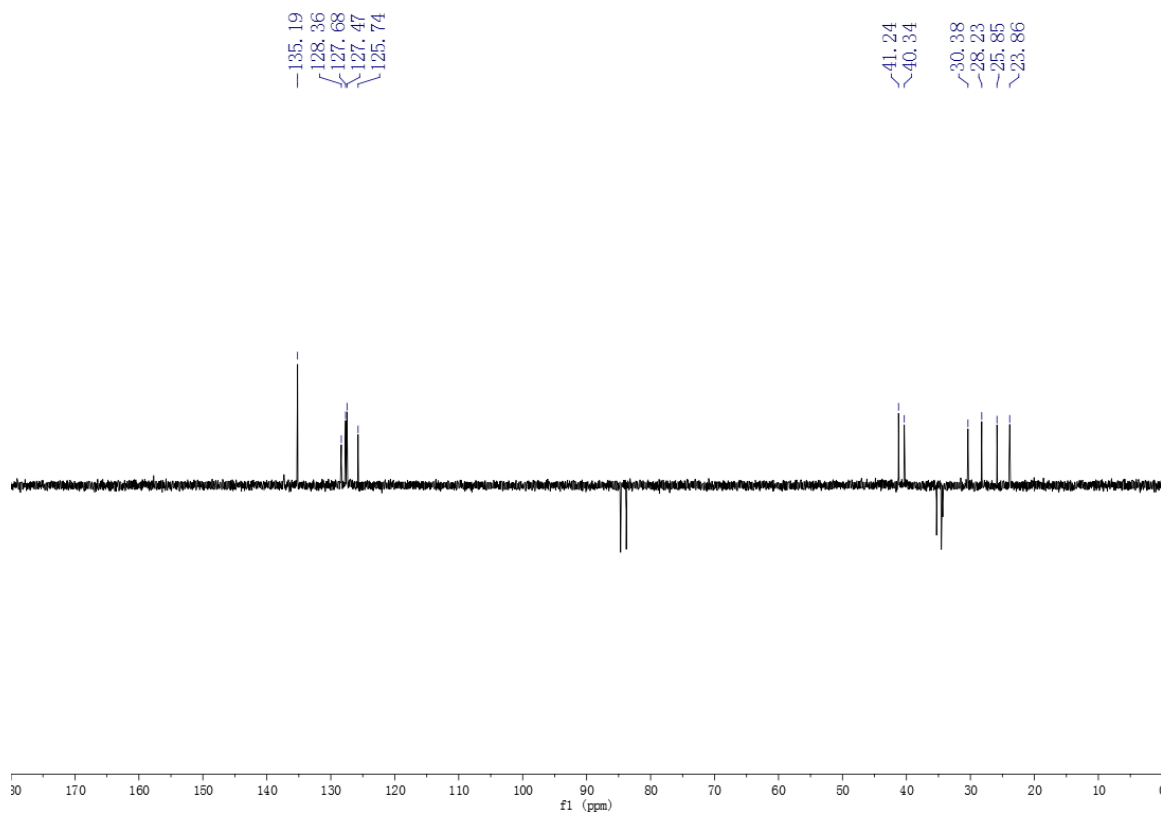

$^{11}\text{B}$  NMR

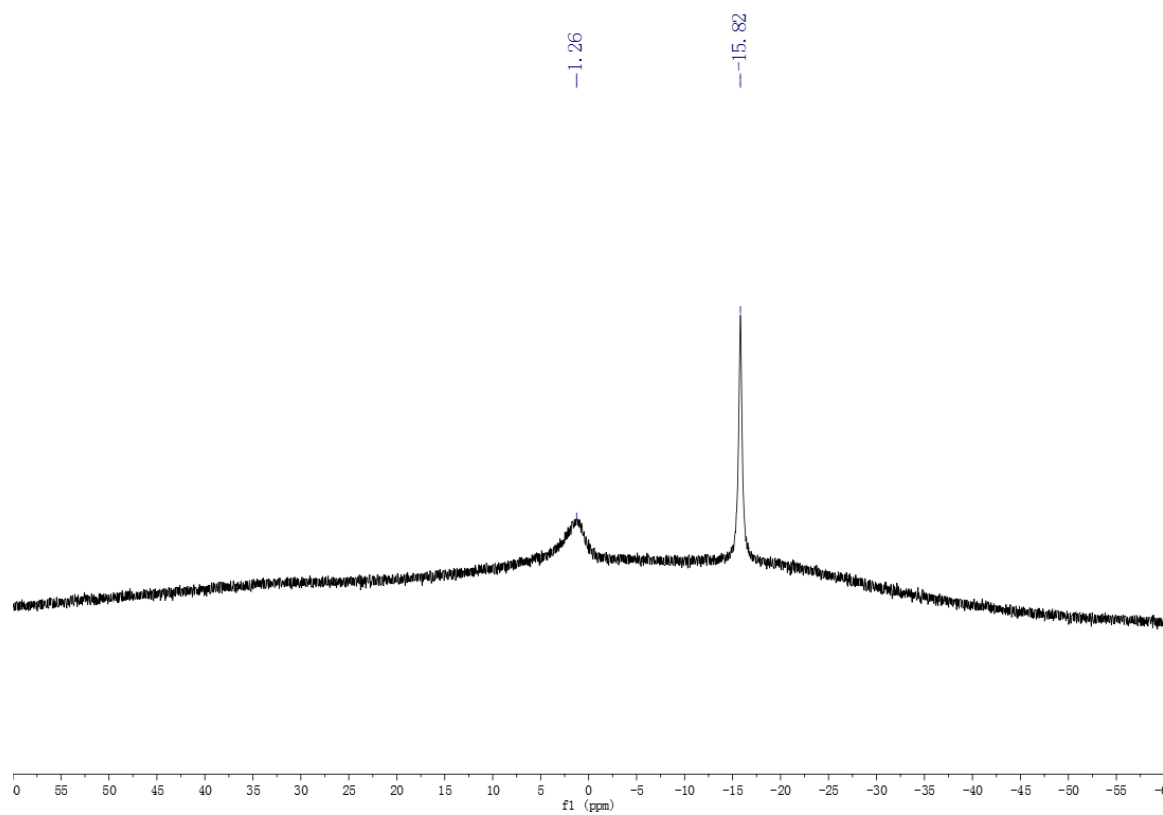

Supplement: SC-006-C5SC03174E-s001.pdf [file SC-006-C5SC03174E-s001.pdf]
